# Supplementary material for: Design, synthesis and biological evaluation of novel dimeric and tetrameric cRGD–paclitaxel conjugates for integrin-assisted drug delivery
Source: Royal Society of Chemistry journal article supplement (doi:10.1039/c5ob00497g), 2015-01-01
Supplement: c5ob00497g1.pdf [file c5ob00497g1.pdf]

## Design, Synthesis and Biological Evaluation of Novel Dimeric and Tetrameric cRGD-Paclitaxel Conjugates for Integrin-Assisted Drug Delivery

A. Bianchi,<sup>†a</sup> D. Arosio,<sup>†b</sup> P. Perego,<sup>c</sup> M. De Cesare,<sup>c</sup> N. Carenini,<sup>c</sup> N. Zaffaroni,<sup>c</sup> M. De Matteo,<sup>a</sup> and L. Manzoni<sup>b,\*</sup>

<sup>a</sup> Centro Interdipartimentale Studi Biomolecolari e Applicazioni Industriali, Università degli Studi di Milano, Via Fantoli 16/15, I-20138 Milano, Italy; present address CISI srl, Via Fantoli 16/15, I-20138 Milano, Italy.

<sup>b</sup> Istituto di Scienze e Tecnologie Molecolari, Consiglio Nazionale delle Ricerche, Via Golgi 19, I-20133 Milano, Italy.

<sup>c</sup> Fondazione IRCCS Istituto Nazionale dei Tumori, Dipartimento di Oncologia Sperimentale e Medicina Molecolare, Via Amadeo 42, I-20133 Milan, Italy.

<sup>†</sup> These authors contributed equally to the project.

### Table of Contents

|                                                                                    |     |
|------------------------------------------------------------------------------------|-----|
| • Title Page and Table of Contents                                                 | S1  |
| • Copies of <sup>1</sup> H and <sup>13</sup> C NMR spectra of selected compounds   | S2  |
| • HPLC purification conditions                                                     | S13 |
| • HPLC purity profiles of compounds <b>3a</b> , <b>3b</b> , <b>3c</b> and <b>4</b> | S15 |
| • Biology                                                                          | S23 |

**Compound 5.**  $^1\text{H-NMR}$  ( $\text{CDCl}_3$ , 400 MHz)

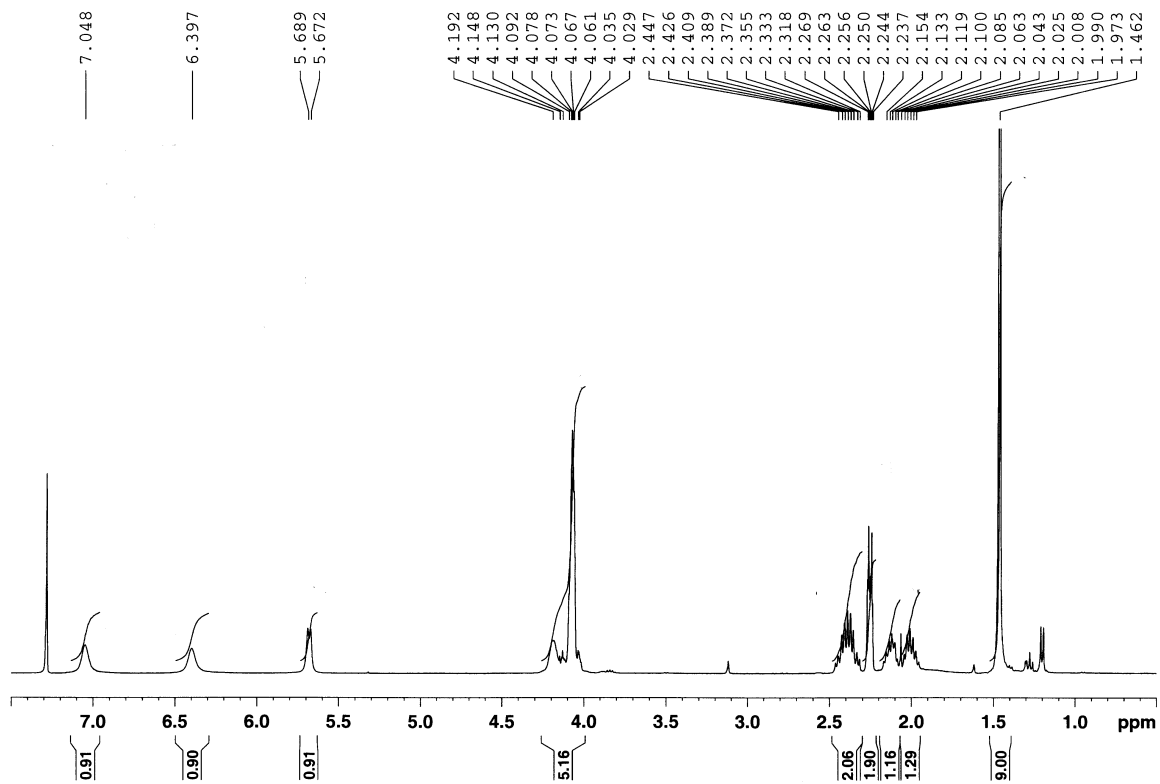

**Compound 5.**  $^{13}\text{C-NMR}$  ( $\text{CDCl}_3$ , 100.6 MHz)

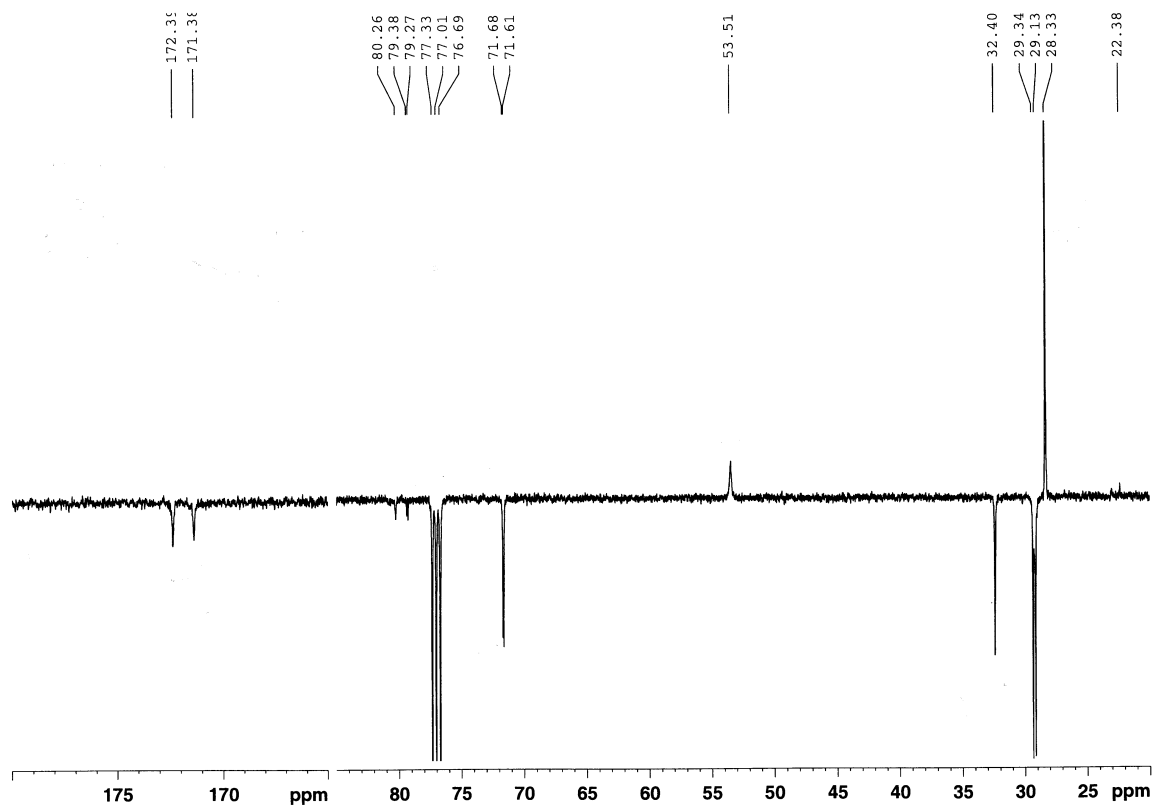

**Compound 6.**  $^1\text{H-NMR}$  (DMSO, 400 MHz)

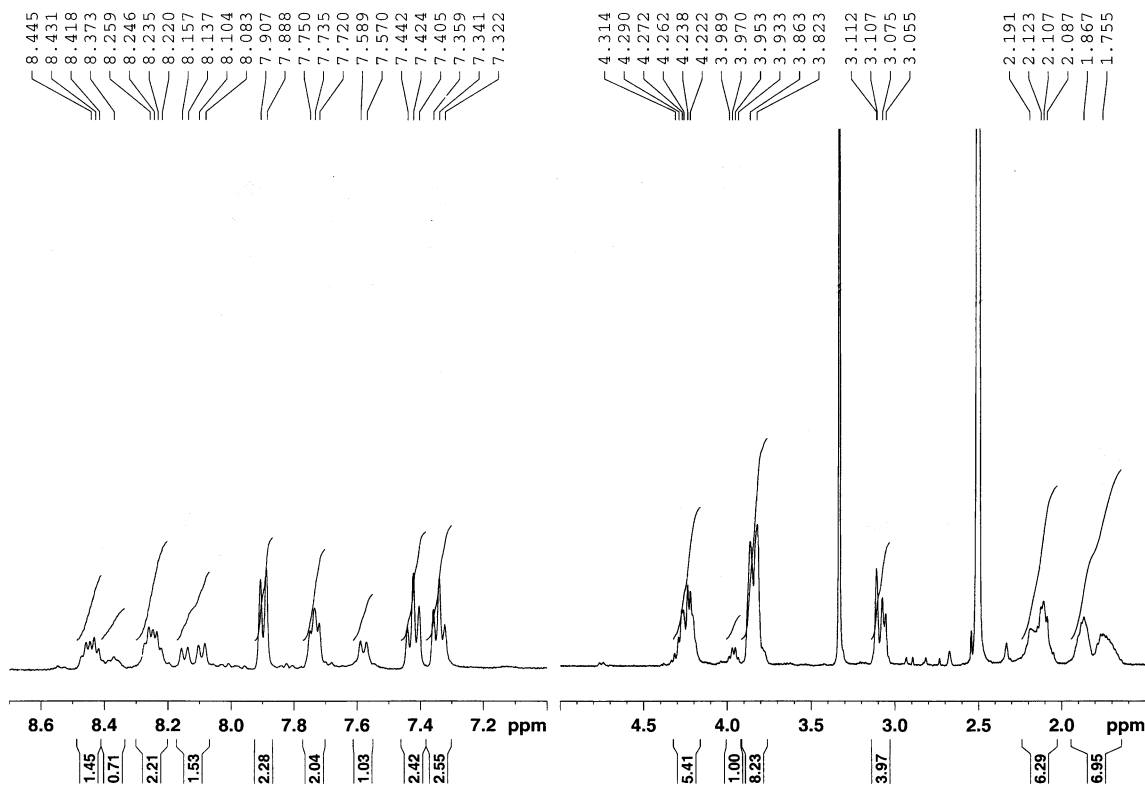

**Compound 6.**  $^{13}\text{C-NMR}$  (DMSO, 100.6 MHz)

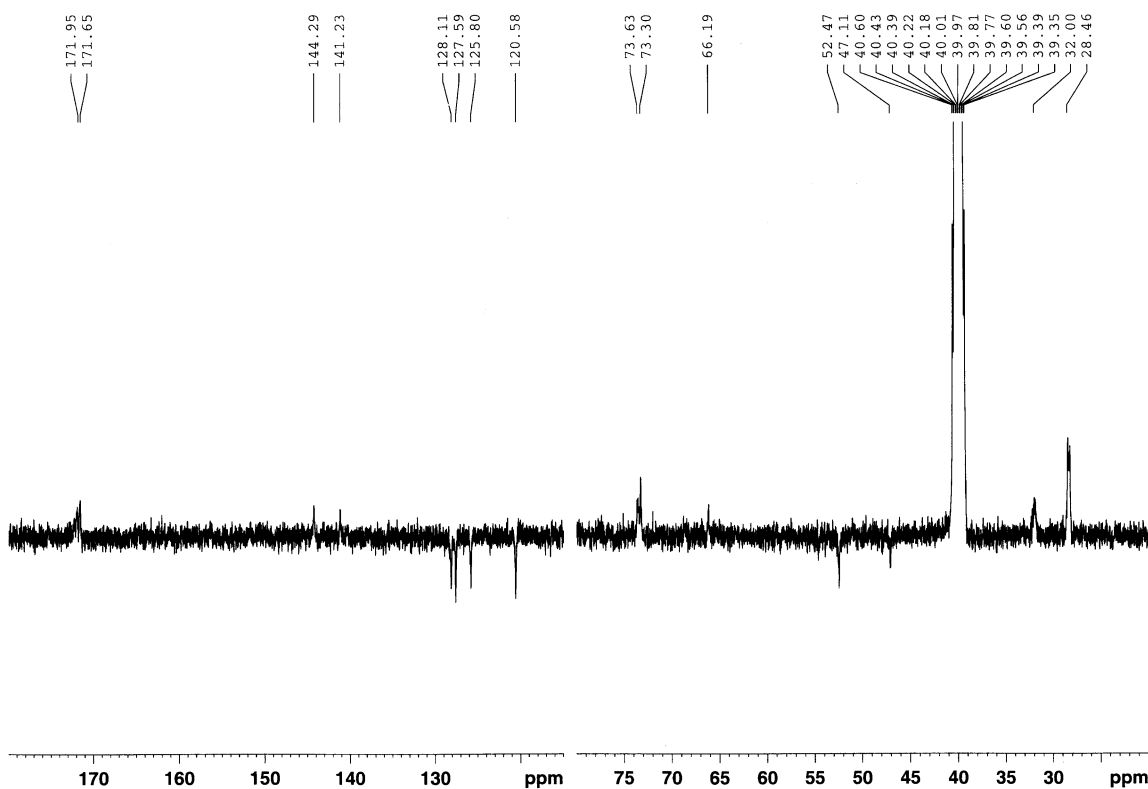

**Compound 9a.**  $^1\text{H-NMR}$  ( $\text{CD}_3\text{CN}$ , 400 MHz)

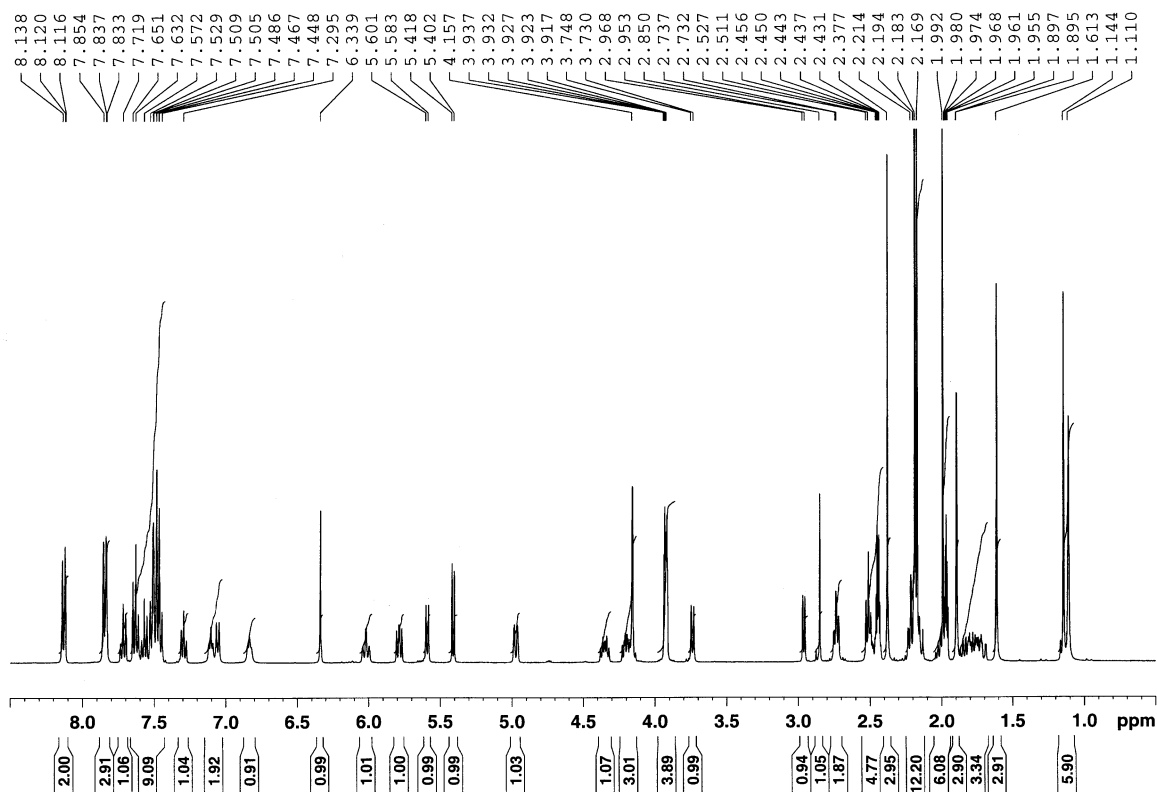

**Compound 9a.**  $^{13}\text{C-NMR}$  ( $\text{CD}_3\text{CN}$ , 100.6 MHz)

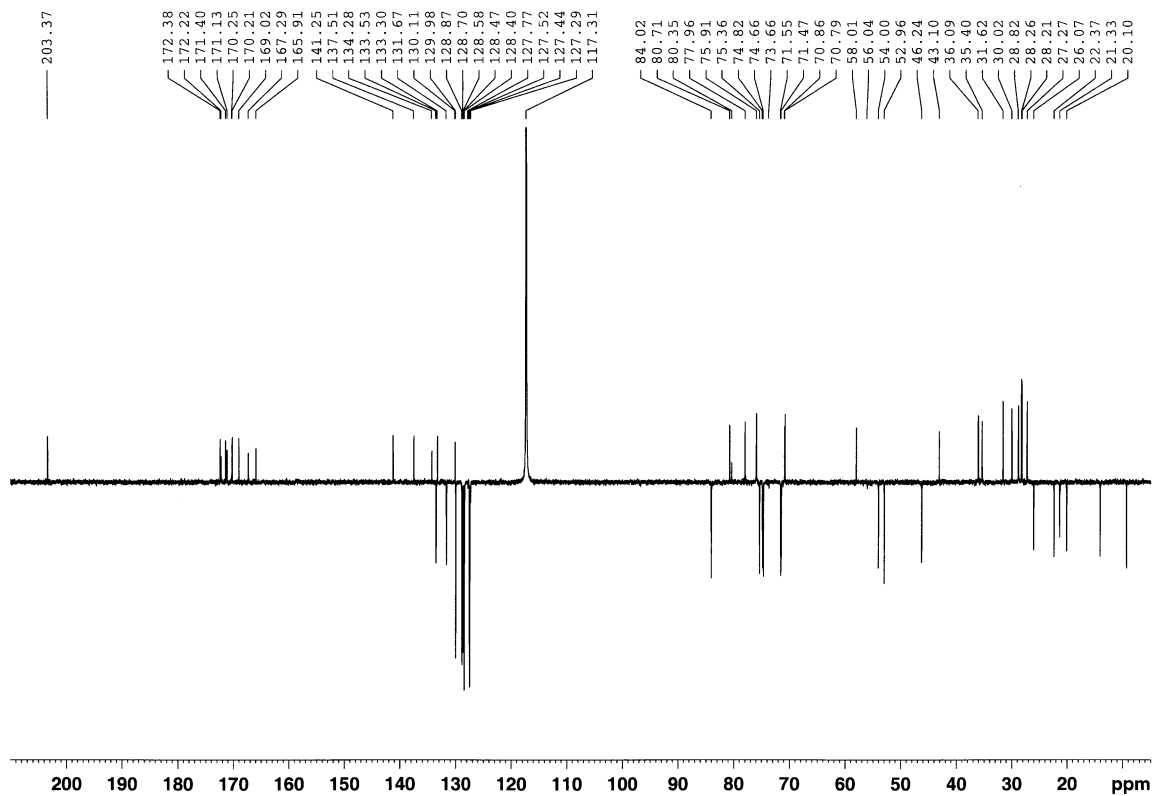

**Compound 9b.**  $^1\text{H-NMR}$  ( $\text{CD}_3\text{CN}$ , 400 MHz)

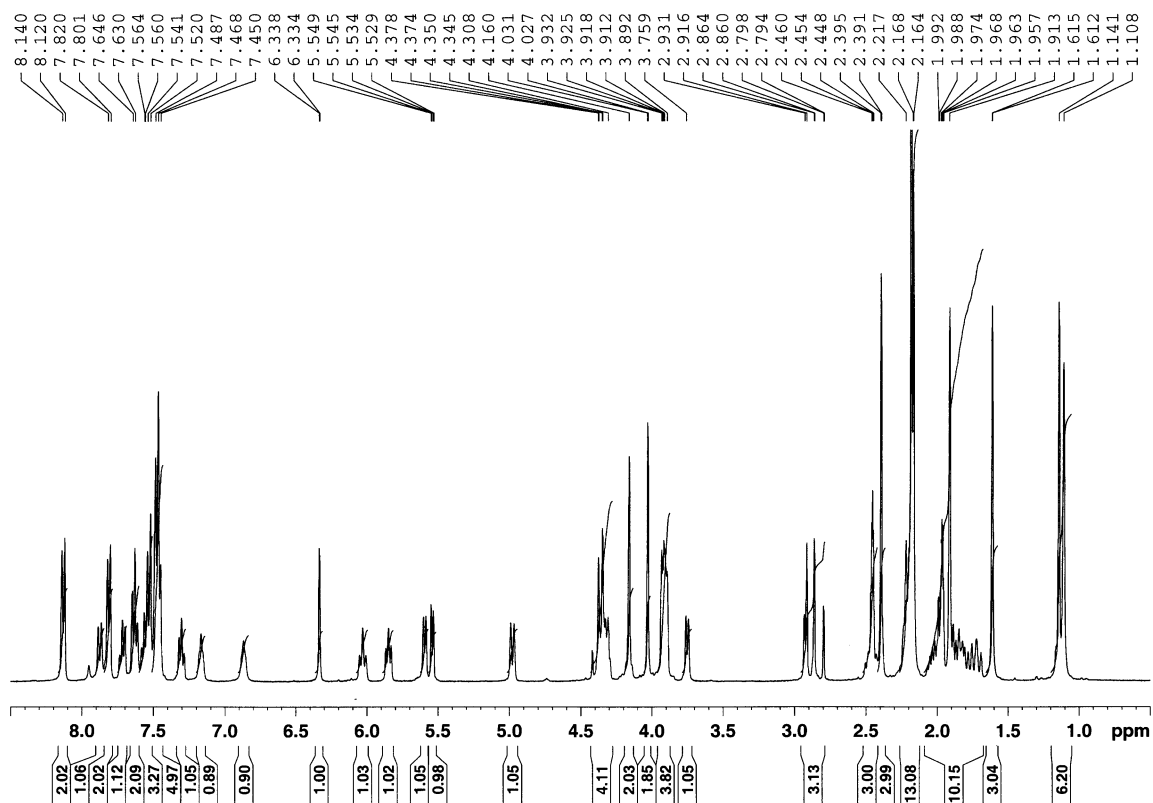

**Compound 9b.**  $^{13}\text{C-NMR}$  ( $\text{CD}_3\text{CN}$ , 100.6 MHz)

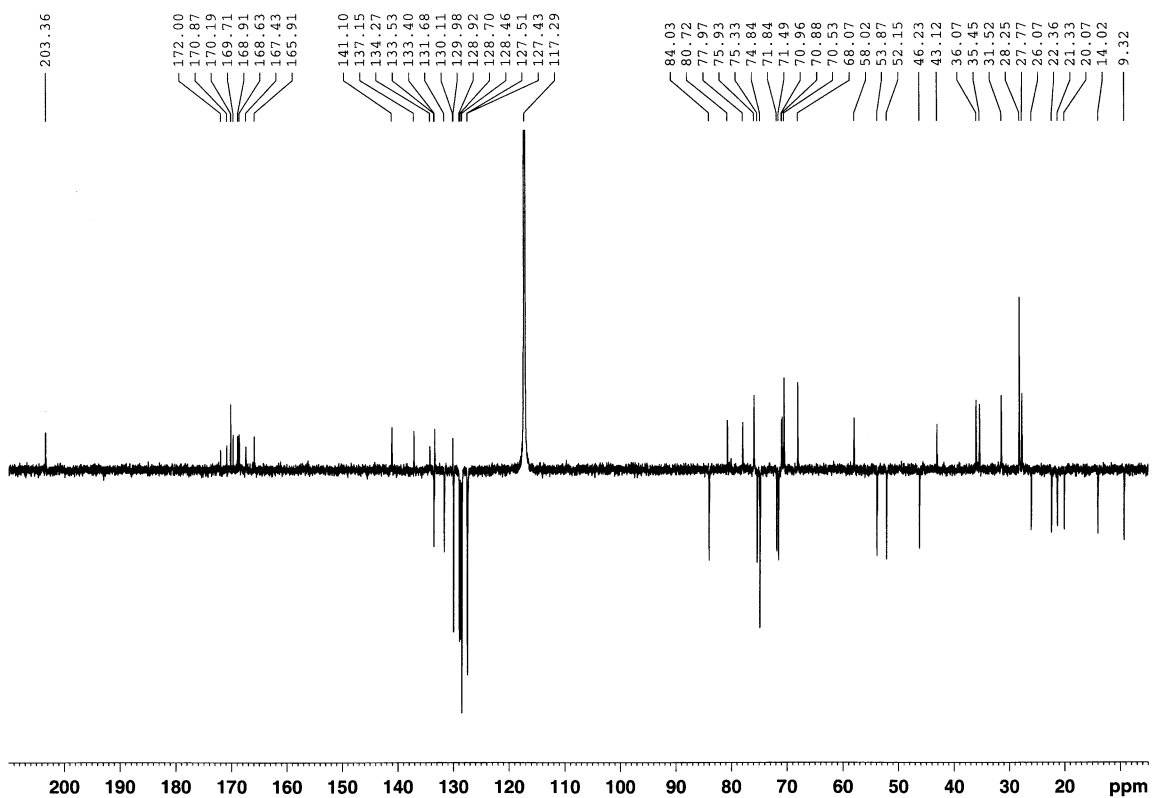

**Compound 3a.**  $^1\text{H-NMR}$  (3:2  $\text{CD}_3\text{CN}/\text{D}_2\text{O}$ , 600 MHz)

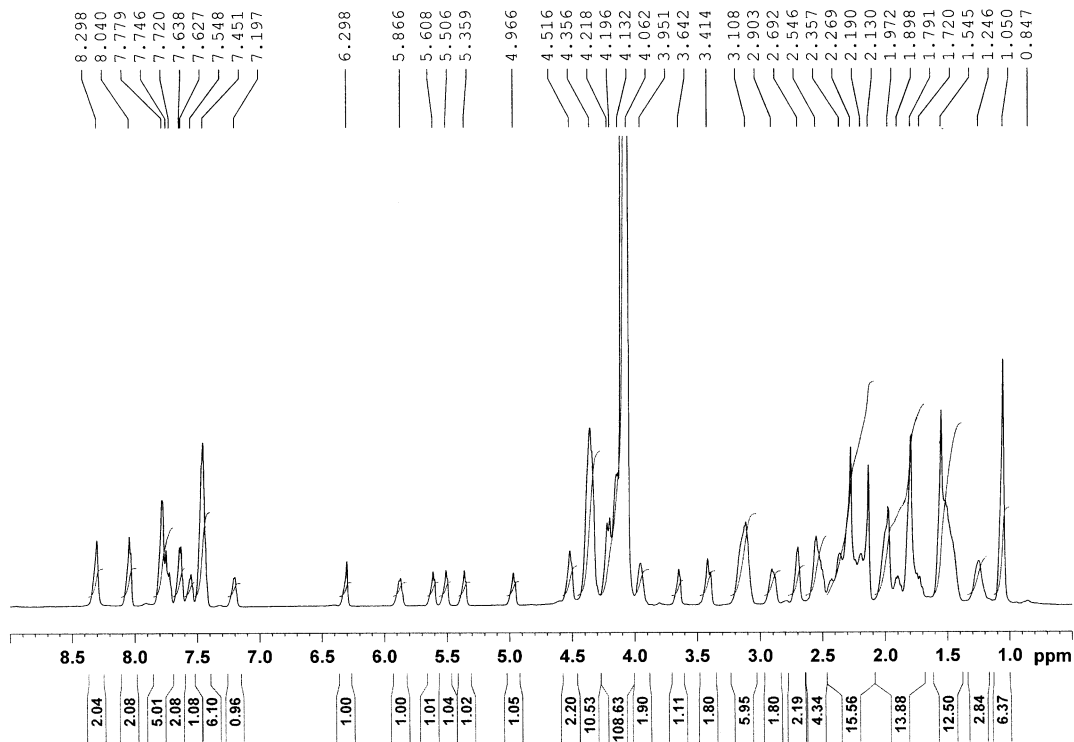

**Compound 3a.**  $^{13}\text{C-NMR DEPT}$  (3:2  $\text{CD}_3\text{CN}/\text{D}_2\text{O}$ , 150.9 MHz)

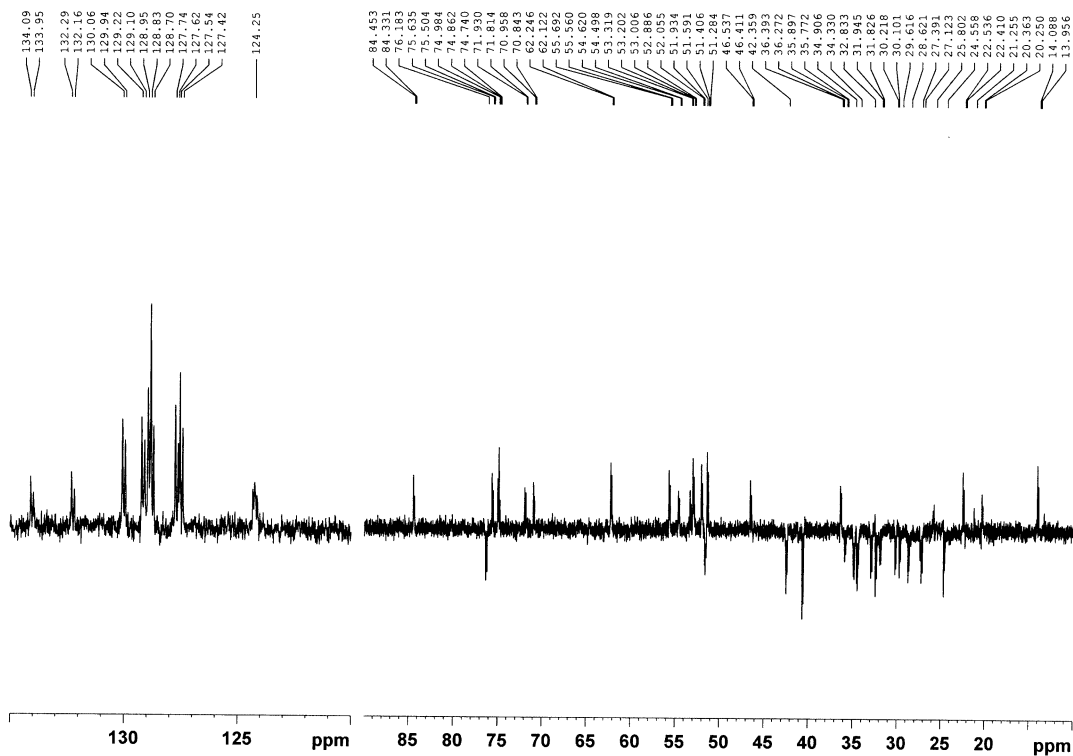

**Compound 3b.**  $^1\text{H-NMR}$  (3:2  $\text{CD}_3\text{CN}/\text{D}_2\text{O}$ , 600 MHz)

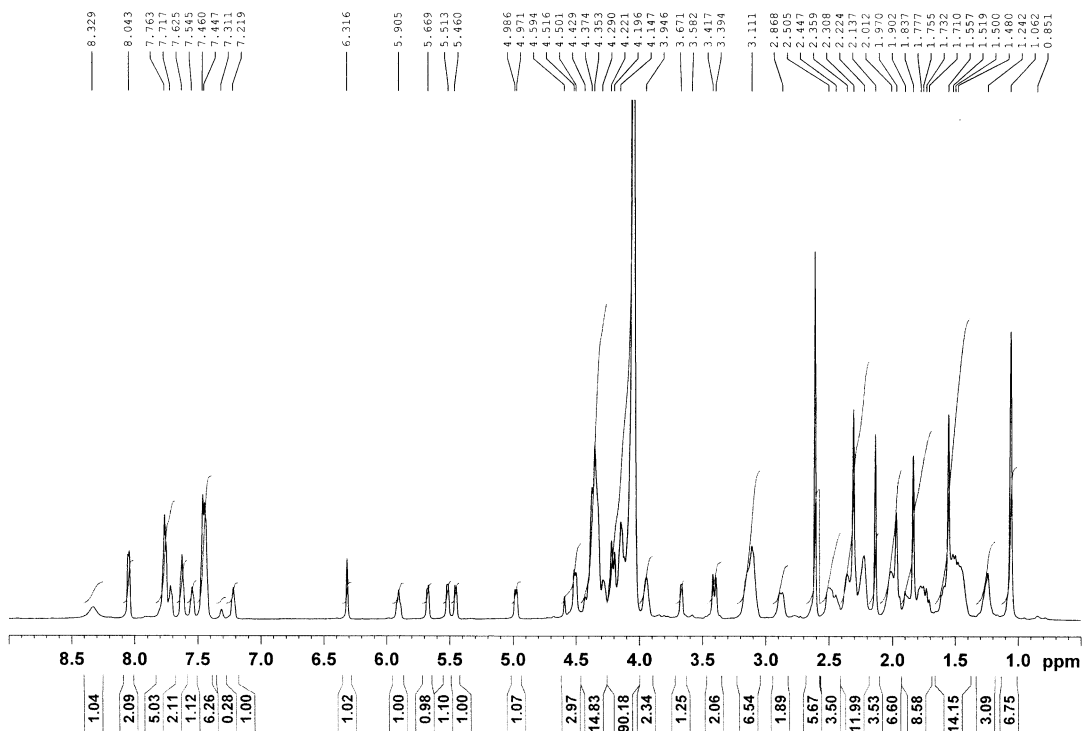

**Compound 3b.**  $^{13}\text{C-NMR DEPT}$  (3:2  $\text{CD}_3\text{CN}/\text{D}_2\text{O}$ , 150.9 MHz)

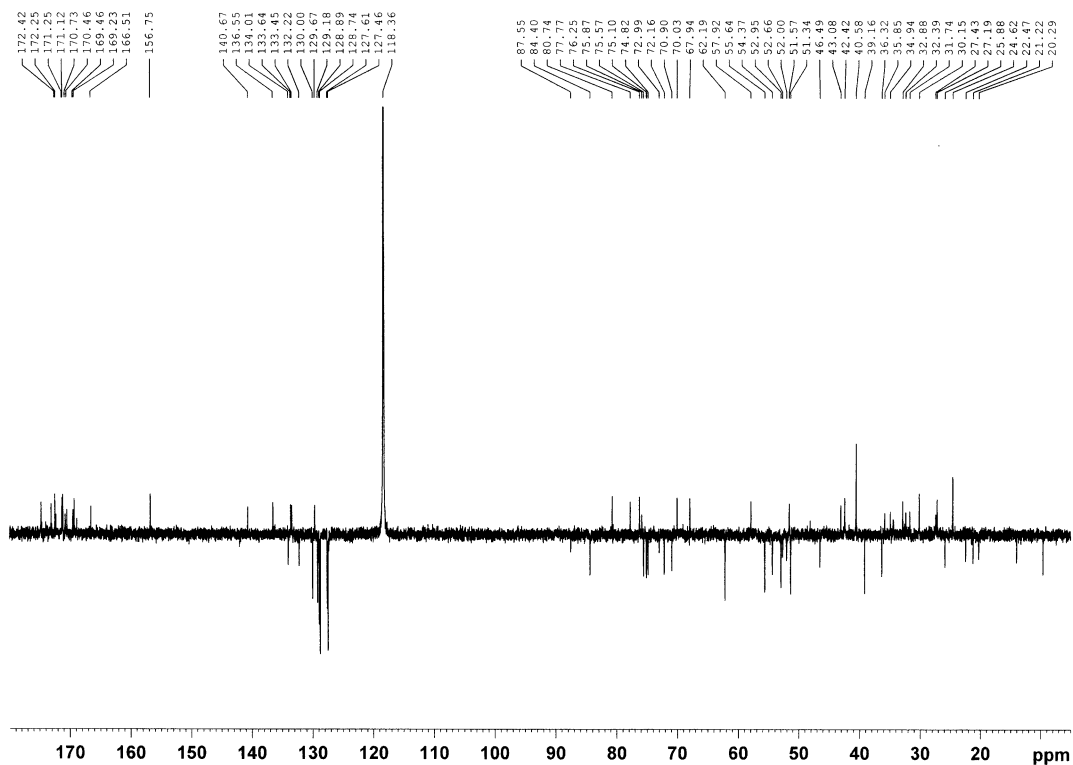

**Compound 3c.**  $^1\text{H-NMR}$  (3:2  $\text{CD}_3\text{CN}/\text{D}_2\text{O}$ , 400 MHz)

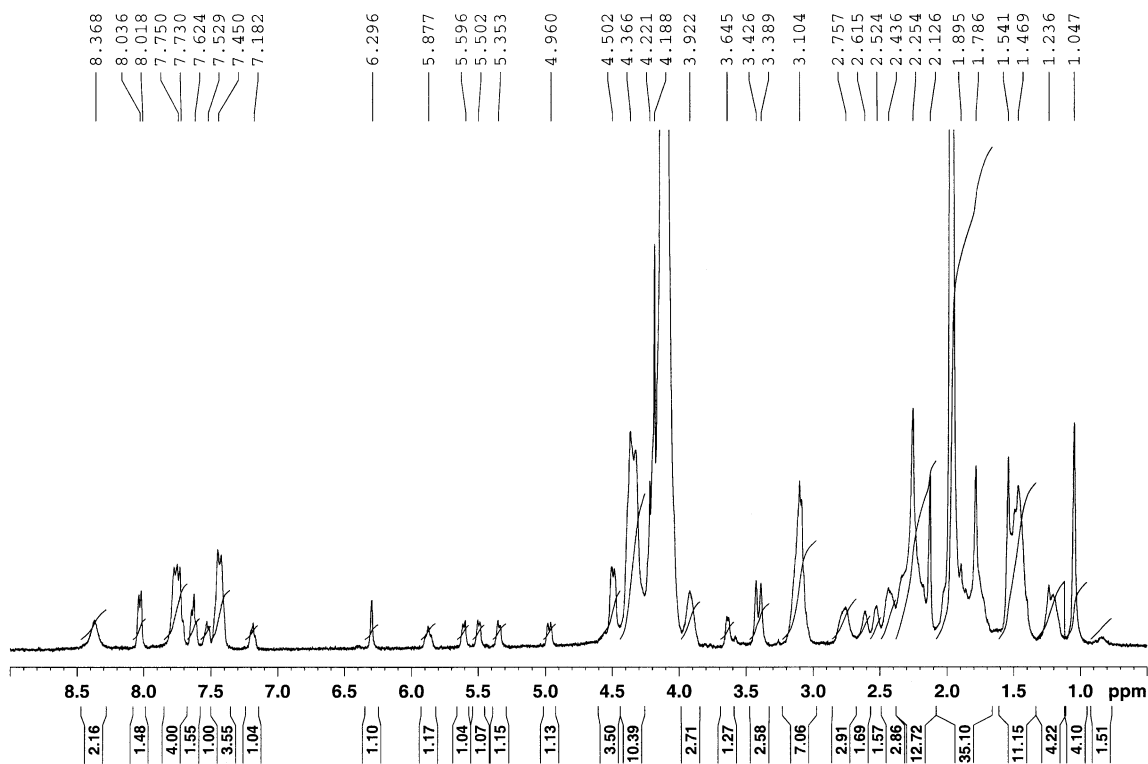

**Compound 3c.**  $^{13}\text{C-NMR HSQC}$  (3:2  $\text{CD}_3\text{CN}/\text{D}_2\text{O}$ , 100.6 MHz)

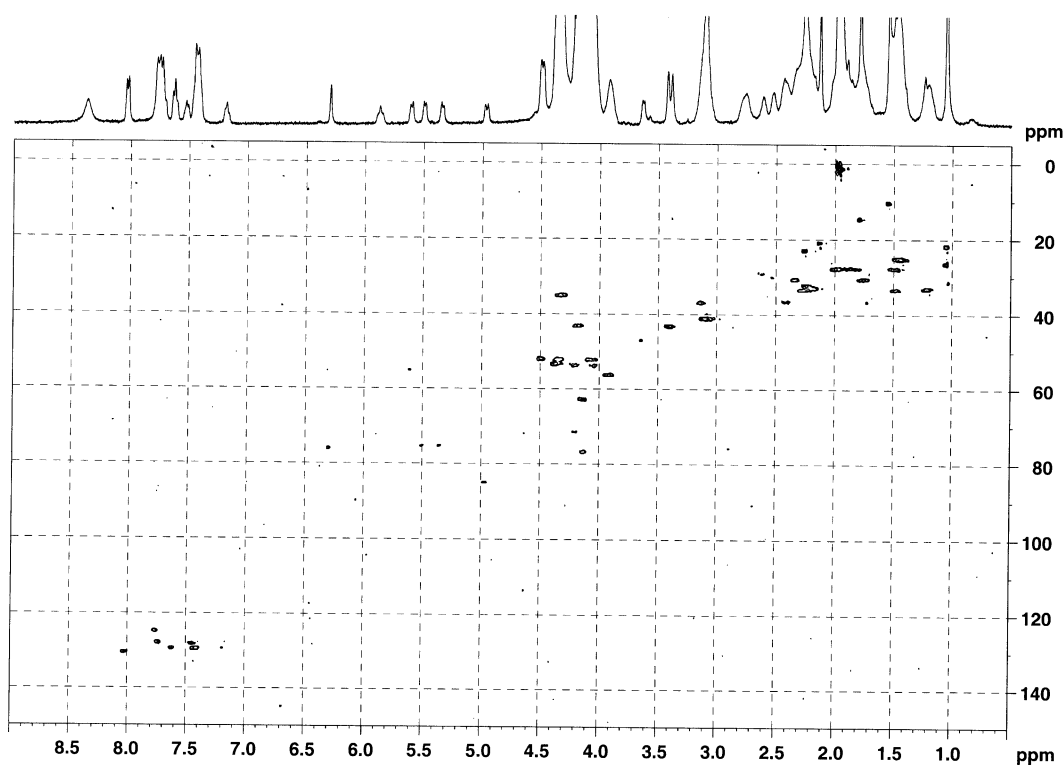



**Compound 13.**  $^1\text{H-NMR}$  ( $\text{CDCl}_3$ , 600 MHz)

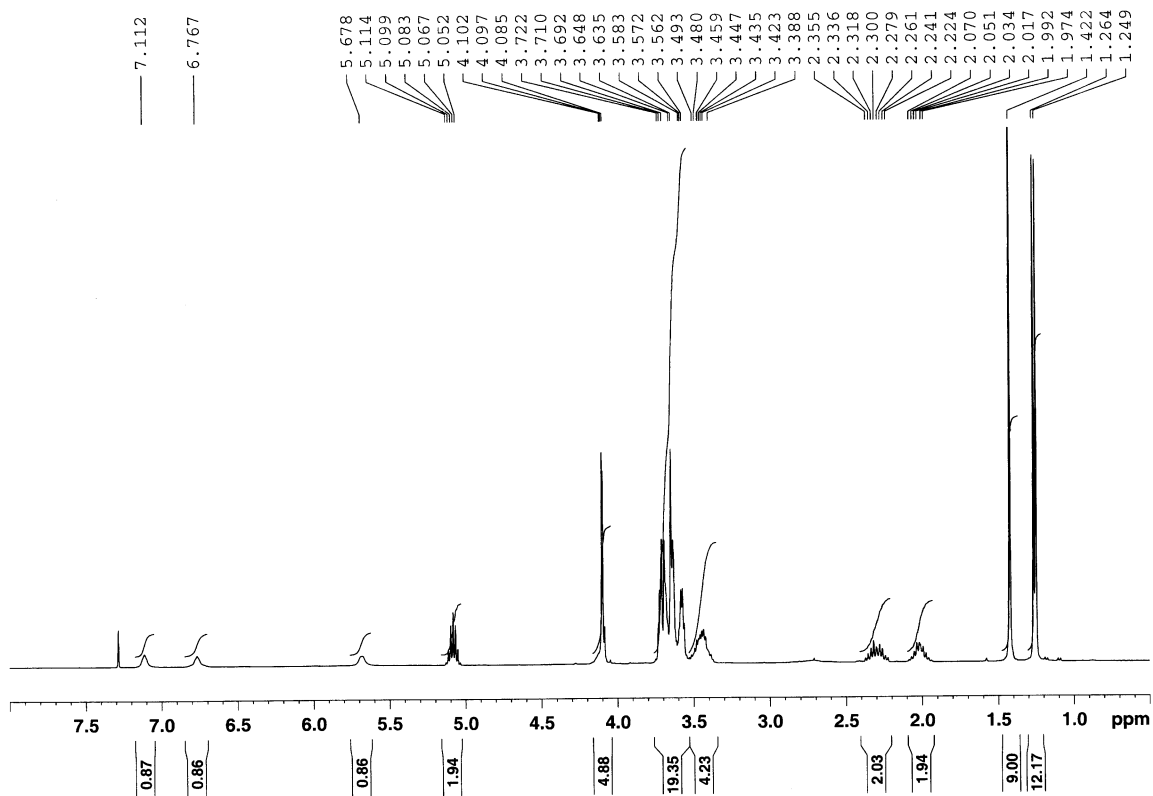

**Compound 13.**  $^{13}\text{C-NMR}$  ( $\text{CDCl}_3$ , 100.6 MHz)

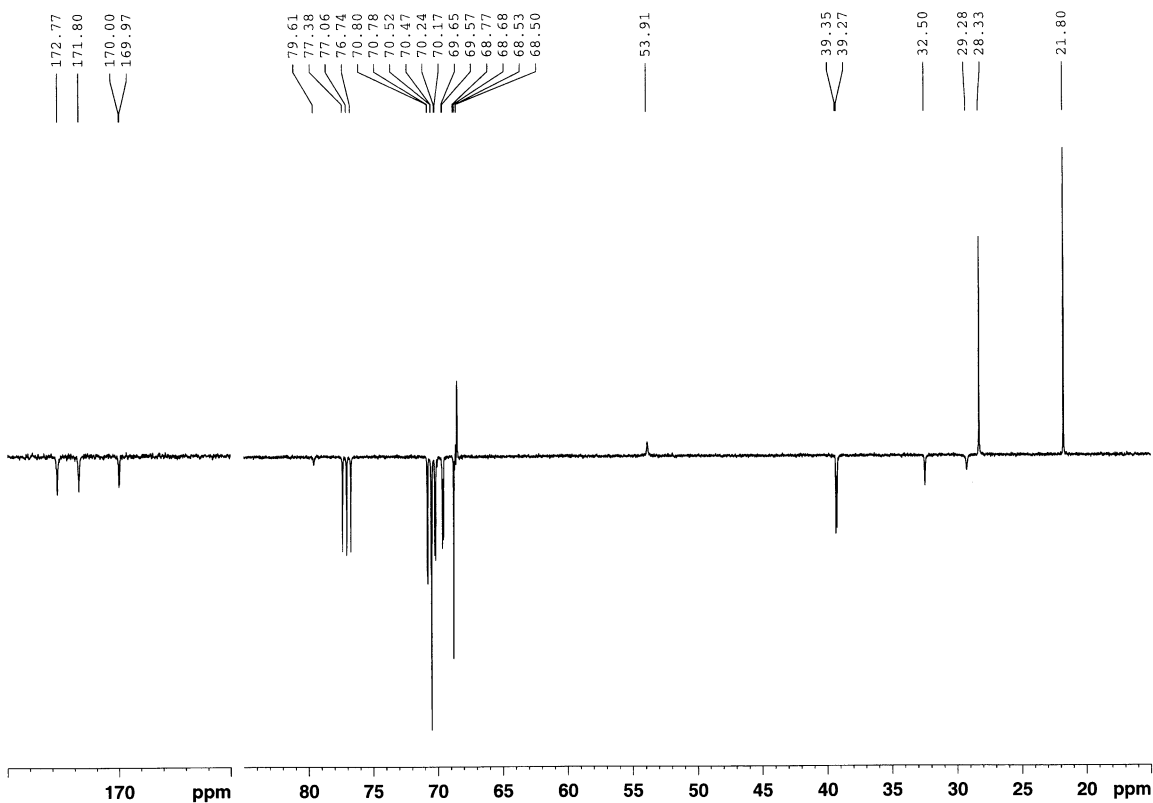

**Compound 14.**  $^1\text{H-NMR}$  ( $\text{D}_2\text{O}$ , 400 MHz)

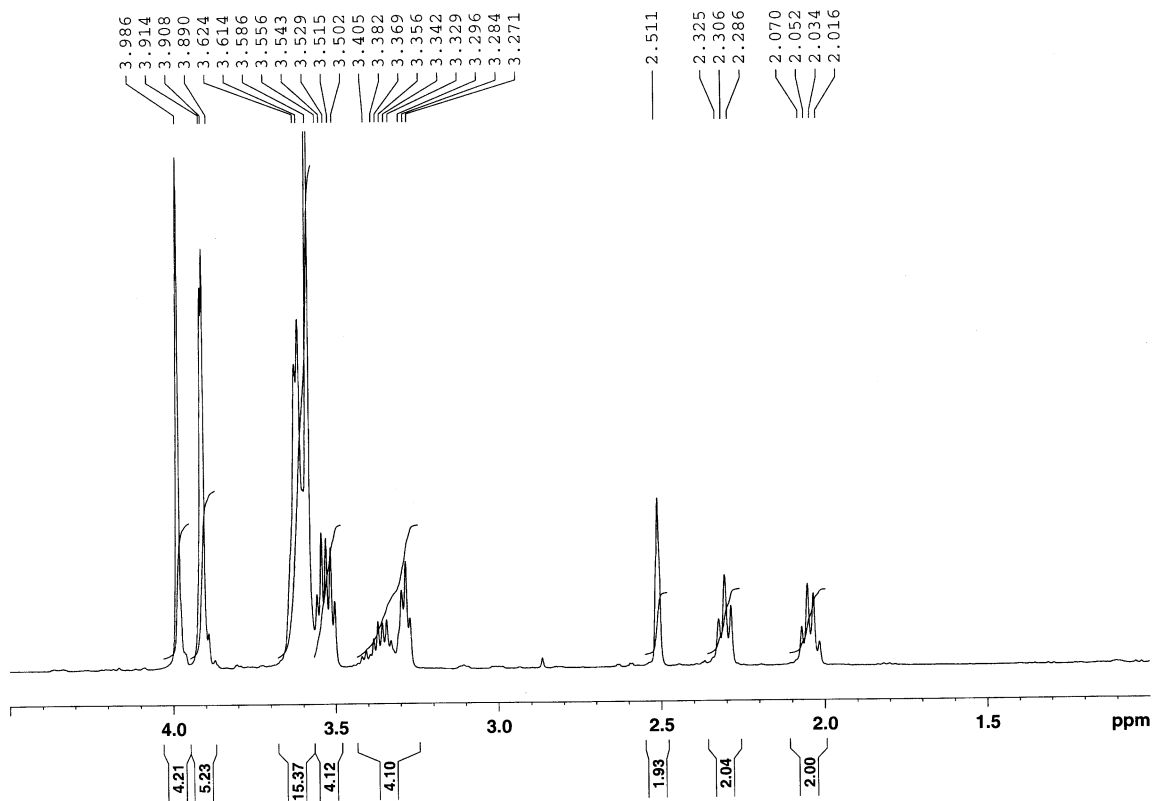

**Compound 14.**  $^{13}\text{C-NMR}$  ( $\text{D}_2\text{O}$ , 100.6 MHz)

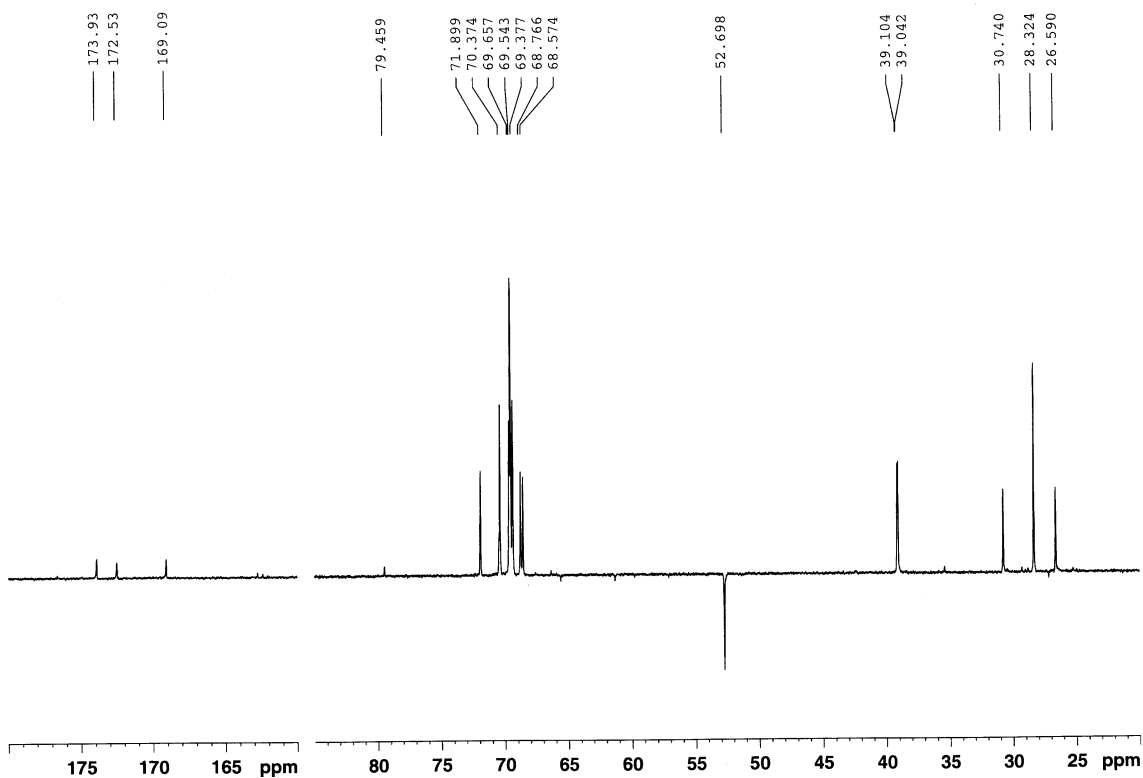

Compound 15. <sup>1</sup>H-NMR (CD<sub>3</sub>CN, 400 MHz)

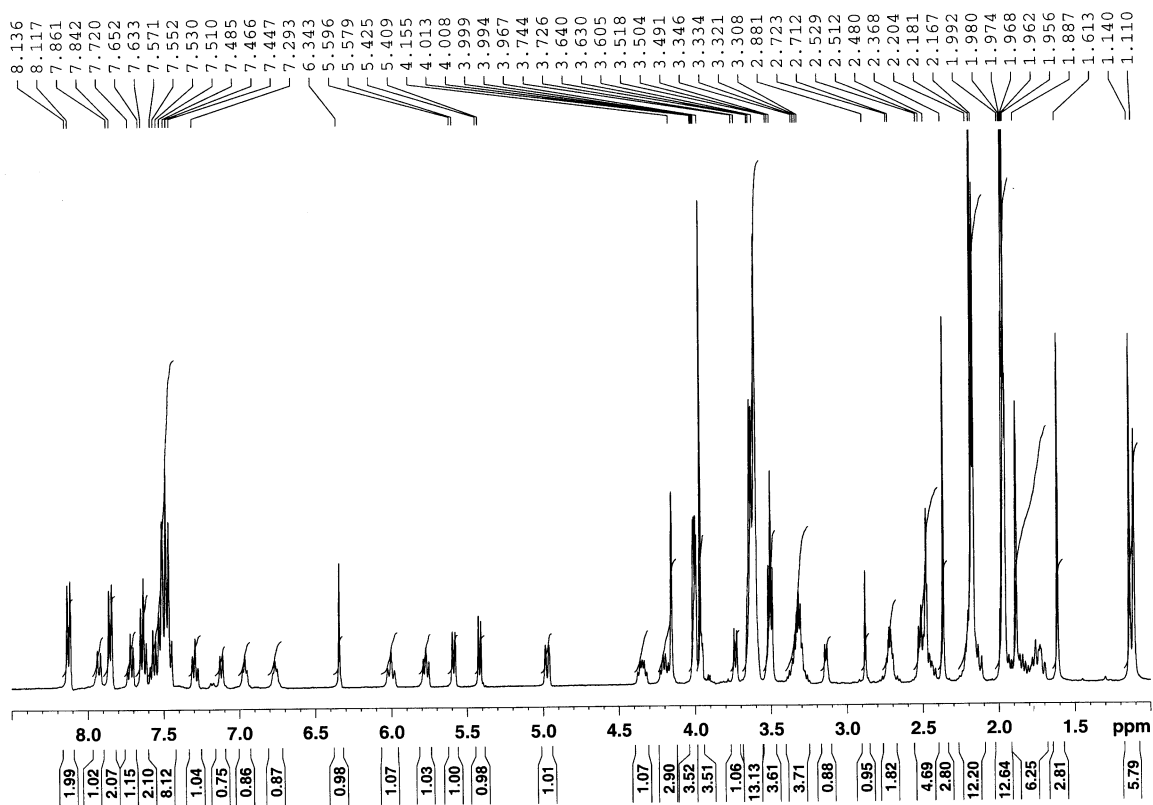

Compound 15. <sup>13</sup>C-NMR (CD<sub>3</sub>CN, 100.6 MHz)

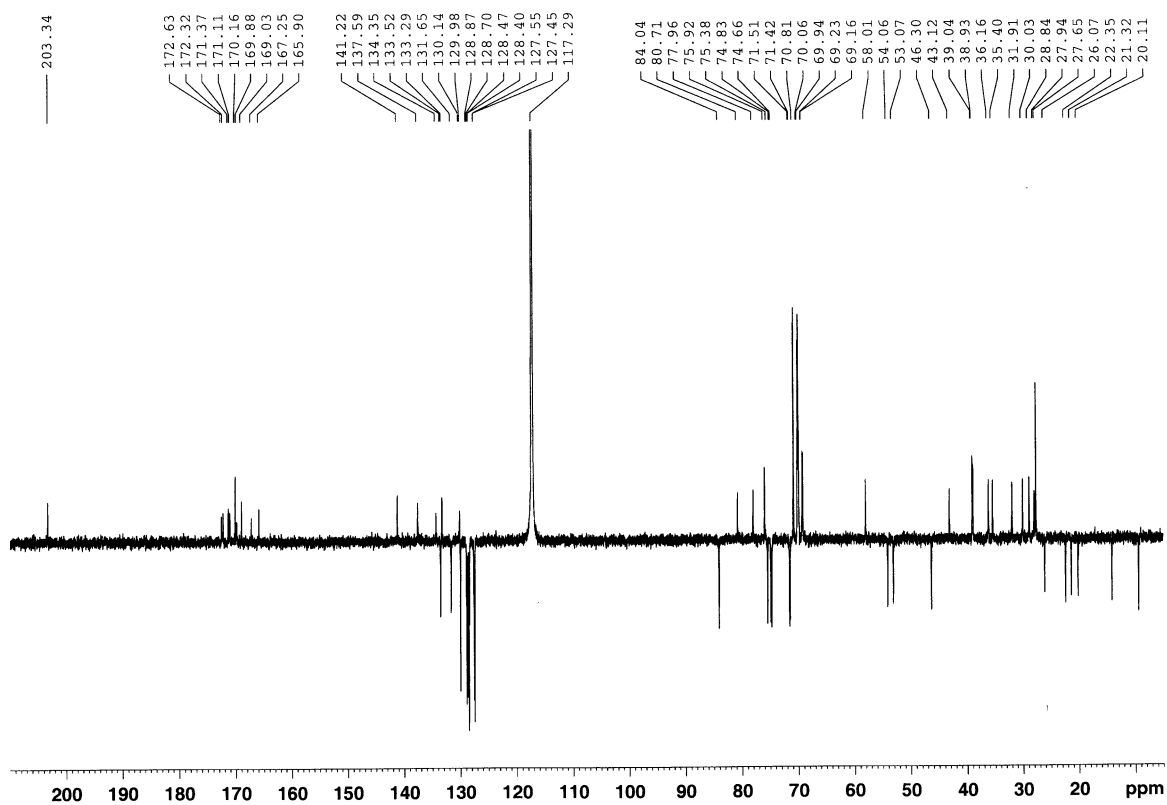

**Compound 4.**  $^1\text{H-NMR}$  (3:2  $\text{CD}_3\text{CN}/\text{D}_2\text{O}$ , 400 MHz)

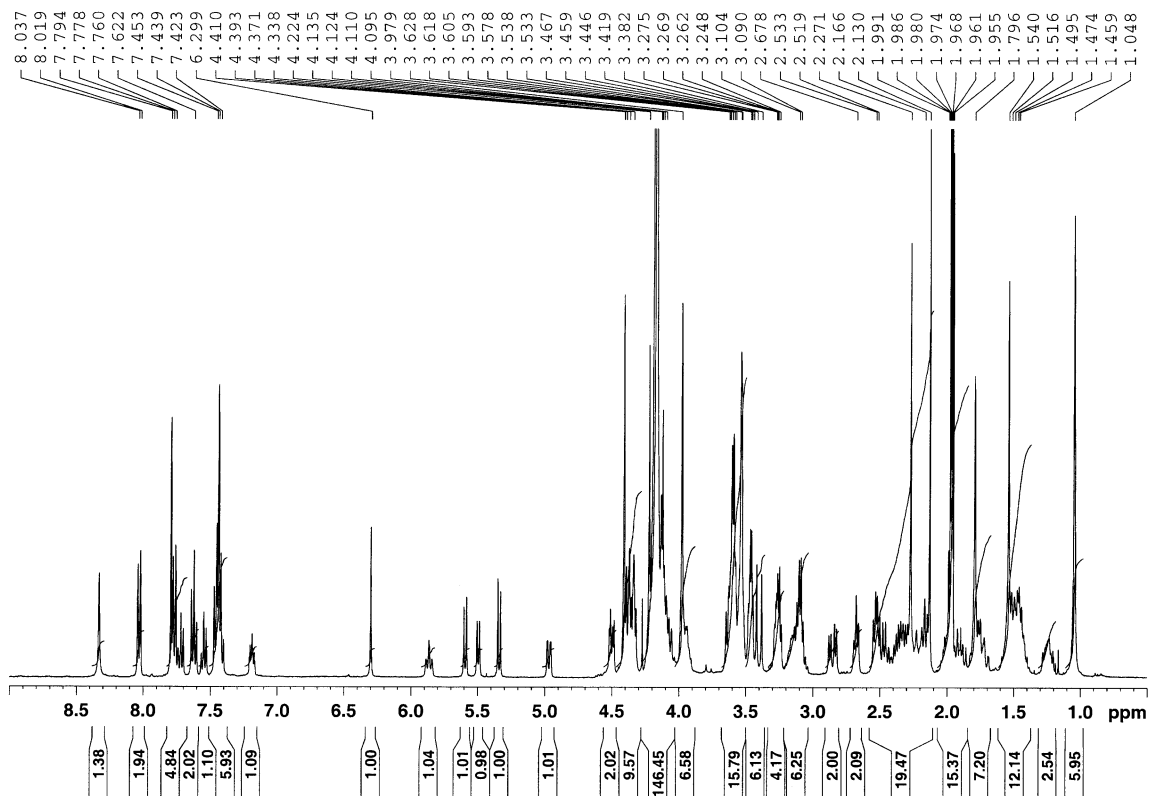

**Compound 4.**  $^{13}\text{C-NMR DEPT}$  (3:2  $\text{CD}_3\text{CN}/\text{D}_2\text{O}$ , 100.6 MHz)

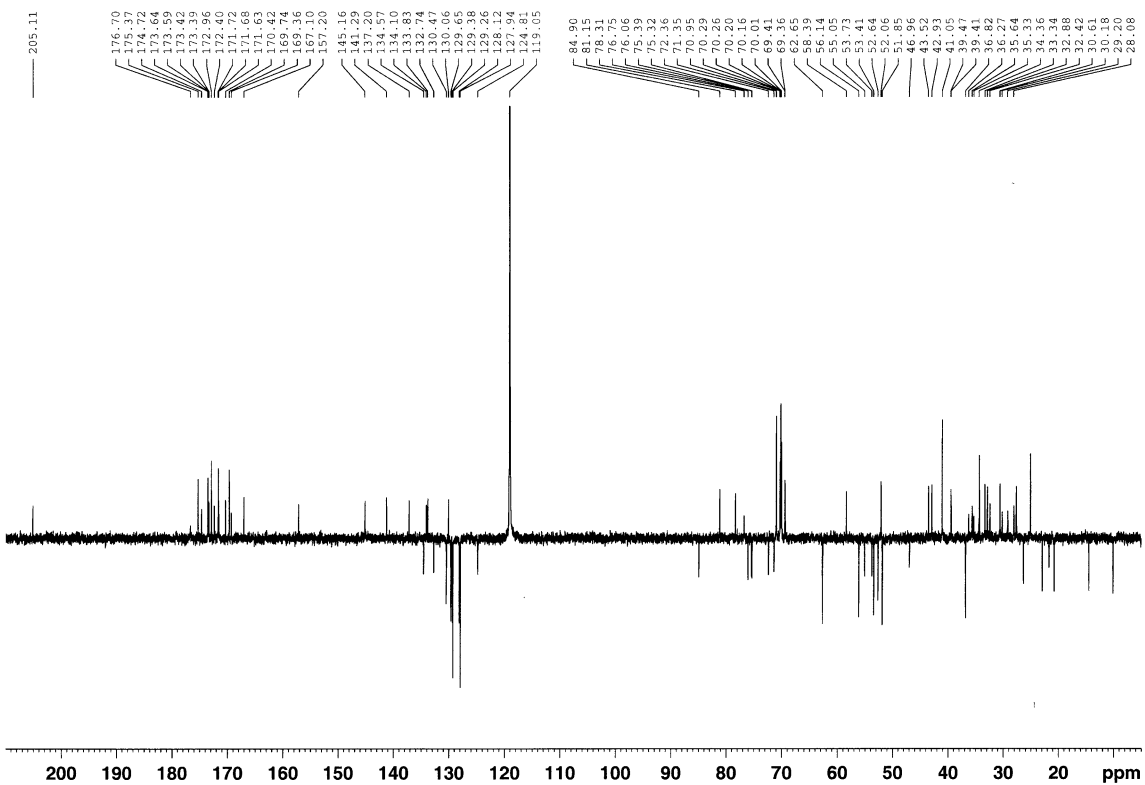

## HPLC Purification

Purification of single compounds was obtained by means of an MS-assisted preparative HPLC (Waters Co, Milford MA, USA) composed of a 2525 binary gradient pump, a 2996 diode array UV detector, a 2767 fraction collector and autosampler, a CFO column selector, a 515 make-up pump and a single quadrupole ZQ Micromass detector. Under the control of the Waters Fractionlynx software, this apparatus is capable of automatically selecting LC fractions on the basis of the experimentally determined mass values if in agreement with pre-defined molecular ions. The fraction collection phase of the purification is thus automated, leaving to the operator the selection of the appropriate chromatographic method (column, gradient, mobile phase modifiers) and the pooling of best fractions.

### Compound 3a

Column: X-Terra RP18, 100 x 19 mm, 5  $\mu$ m Waters

Flow = 20 mL/min

Phase A ( weak solvent ) = water MilliQ + 0.1% HCOOH

Phase B (strong solvent ) = acetonitrile Chromasolv Sigma-Aldrich +0,1% HCOOH

HPLC run gradient

| T(min) | %A | %B  |
|--------|----|-----|
| 0      | 80 | 20  |
| 1      | 80 | 20  |
| 8      | 60 | 40  |
| 8.2    | 0  | 100 |
| 10     | 0  | 100 |

MS method parameters : 0 – 10 min MS monitoring scan 100-1500 uma

Collection at m/z = 1144

### Compound 3b

Column: Atlantis RP18, 100 x 19 mm, 5  $\mu$ m Waters

Flow = 20 mL/min

Phase A ( weak solvent ) = water MilliQ + 0.1% HCOOH

Phase B (strong solvent ) = acetonitrile Chromasolv Sigma-Aldrich +0,1% HCOOH

HPLC run gradient

| T(min) | %A | %B  |
|--------|----|-----|
| 0      | 70 | 30  |
| 1      | 70 | 30  |
| 8      | 65 | 35  |
| 8.2    | 0  | 100 |
| 10     | 0  | 100 |

MS method parameters : 0 – 10 min MS monitoring scan 100-1500 uma

Collection at m/z = 1151

### **Compound 3c**

Column: Symmetry RP18, 300 x 19 mm, 7 µm Waters

Flow = 20 mL/min

Phase A ( weak solvent ) = water MilliQ + 0.1% HCOOH

Phase B (strong solvent ) = acetonitrile Chromasolv Sigma-Aldrich +0,1% HCOOH

HPLC run gradient

| T(min) | %A | %B  |
|--------|----|-----|
| 0      | 85 | 15  |
| 2      | 85 | 15  |
| 20     | 75 | 25  |
| 20.5   | 0  | 100 |
| 25     | 0  | 100 |

MS method parameters : 0 – 10 min MS monitoring scan 100-1500 uma

Collection at m/z = 936

### **Compound 4**

Column: Symmetry RP18, 300 x 19 mm, 7 µm Waters

Flow = 20 mL/min

Phase A ( weak solvent ) = water MilliQ + 0.1% HCOOH

Phase B (strong solvent ) = acetonitrile Chromasolv Sigma-Aldrich +0,1% HCOOH

HPLC run gradient

| T(min) | %A | %B  |
|--------|----|-----|
| 0      | 85 | 15  |
| 2      | 85 | 15  |
| 20     | 65 | 35  |
| 20.5   | 0  | 100 |
| 25     | 0  | 100 |

MS method parameters : 0 – 10 min MS monitoring scan 100-1500 uma

Collection at m/z = 889

## General method for analytical HPLC

Column: Supelco Discovery, 150 x 4.6 mm, 5  $\mu$ m

Flow = 1 mL/min

Phase A (weak solvent) = water MilliQ + 0.05% TFA

Phase B (strong solvent) = acetonitrile Chromasolv Sigma-Aldrich + 0.05% TFA

HPLC run gradient: from 20% B to 90% B in 15 min, washing at 100% B for 1 min and equilibration at 20% B in the next 4 min.

$\lambda = 221$  nm

## Compound 3a

### Acquisition Parameter

|                   |              |              |           |                          |          |
|-------------------|--------------|--------------|-----------|--------------------------|----------|
| Ion Source Type   | ESI          | Ion Polarity | Positive  | Alternating Ion Polarity | off      |
| Mass Range Mode   | Std/Normal   | Scan Begin   | 150 m/z   | Scan End                 | 2800 m/z |
| Capillary Exit    | 158.5 Volt   | Skim 1       | 40.0 Volt | Trap Drive               | 78.7     |
| Accumulation Time | 3818 $\mu$ s | Averages     | 5 Spectra | Auto MS/MS               | on       |

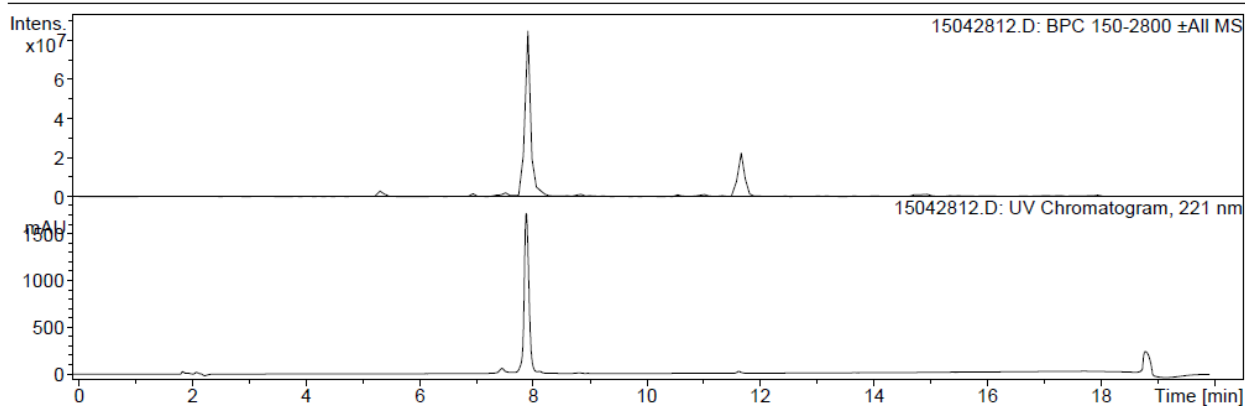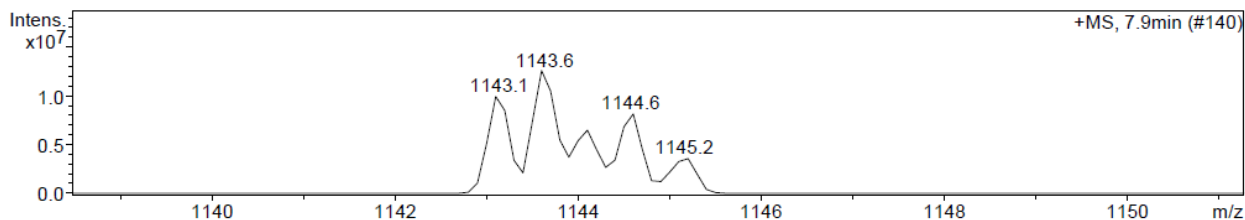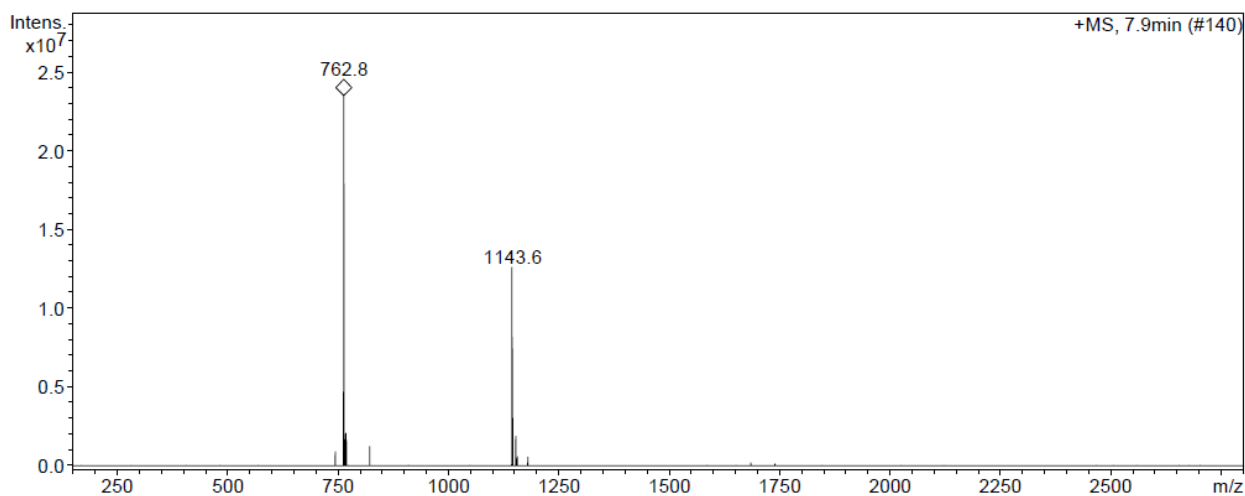

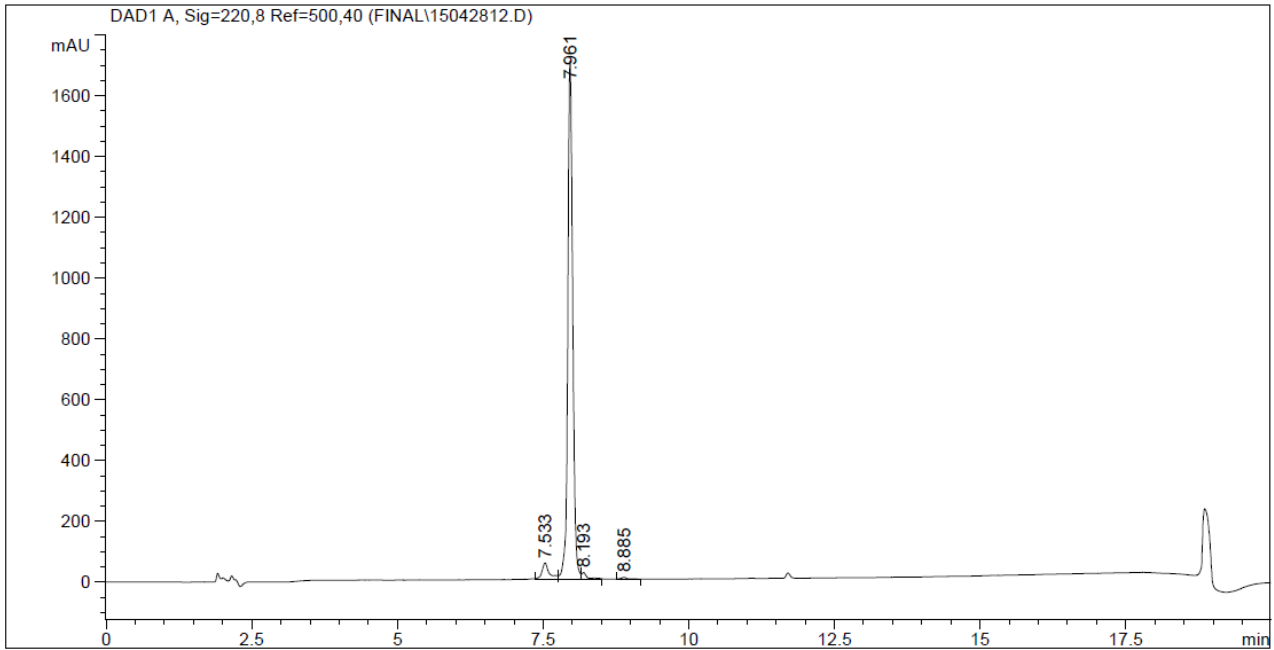

=====  
 Area Percent Report  
 =====

Sorted By : Signal  
 Multiplier : 1.0000  
 Dilution : 1.0000  
 Use Multiplier & Dilution Factor with ISTDs

Signal 1: DAD1 A, Sig=220,8 Ref=500,40

| Peak # | RetTime [min] | Type | Width [min] | Area [mAU*s] | Height [mAU] | Area %  |
|--------|---------------|------|-------------|--------------|--------------|---------|
| 1      | 7.533         | BV   | 0.1227      | 448.16693    | 52.95161     | 4.1997  |
| 2      | 7.961         | VV   | 0.0910      | 1.00556e4    | 1700.93188   | 94.2287 |
| 3      | 8.193         | VB   | 0.0846      | 123.20153    | 20.95245     | 1.1545  |
| 4      | 8.885         | BP   | 0.1001      | 44.52004     | 6.32455      | 0.4172  |

Totals : 1.06715e4 1781.16050



# Compound 3b

## Acquisition Parameter

|                   |              |              |           |                          |          |
|-------------------|--------------|--------------|-----------|--------------------------|----------|
| Ion Source Type   | ESI          | Ion Polarity | Positive  | Alternating Ion Polarity | off      |
| Mass Range Mode   | Std/Normal   | Scan Begin   | 150 m/z   | Scan End                 | 2800 m/z |
| Capillary Exit    | 158.5 Volt   | Skim 1       | 40.0 Volt | Trap Drive               | 78.7     |
| Accumulation Time | 4378 $\mu$ s | Averages     | 5 Spectra | Auto MS/MS               | on       |

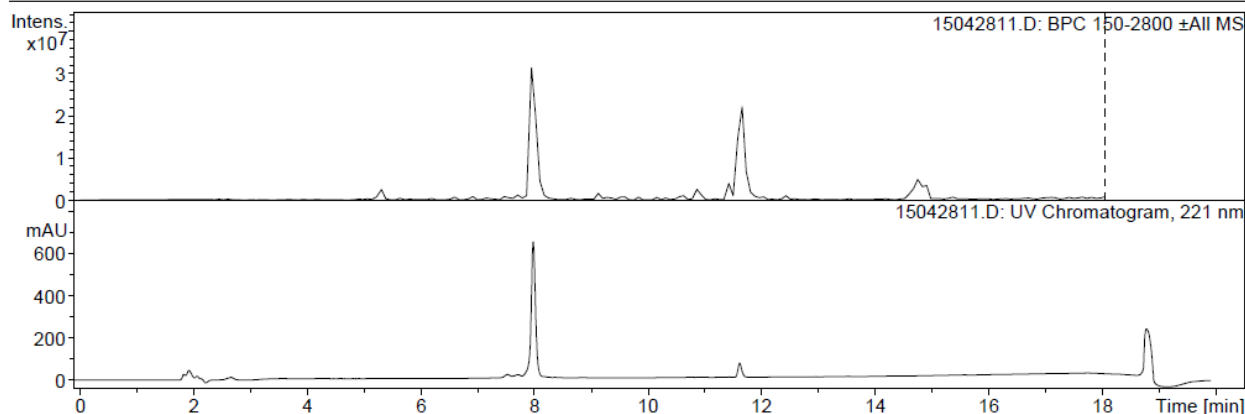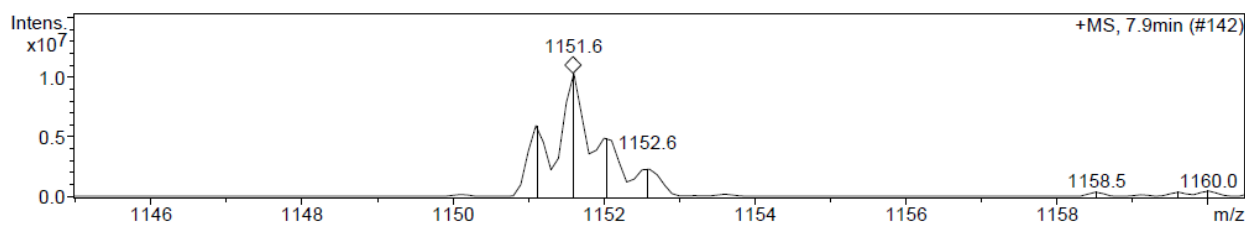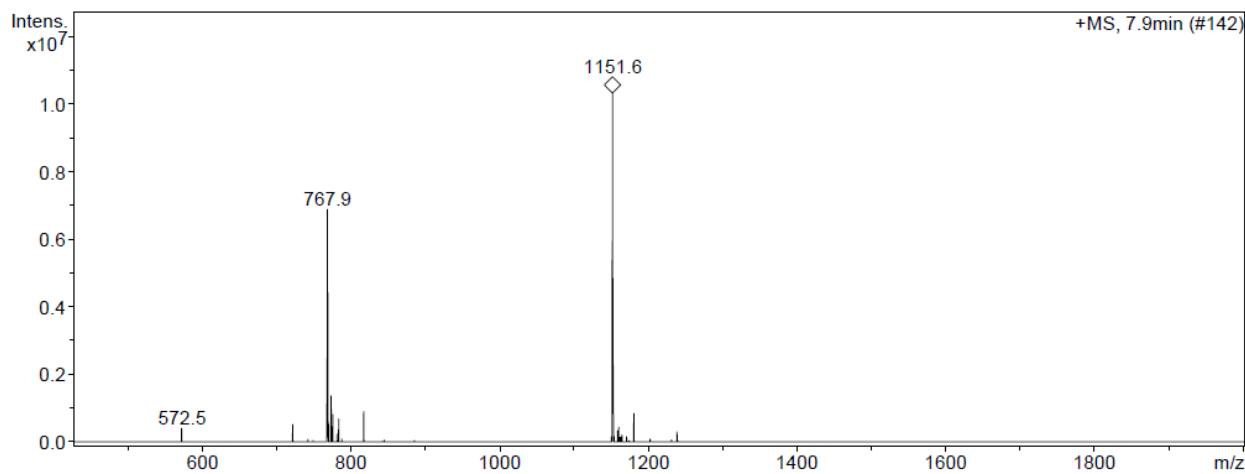

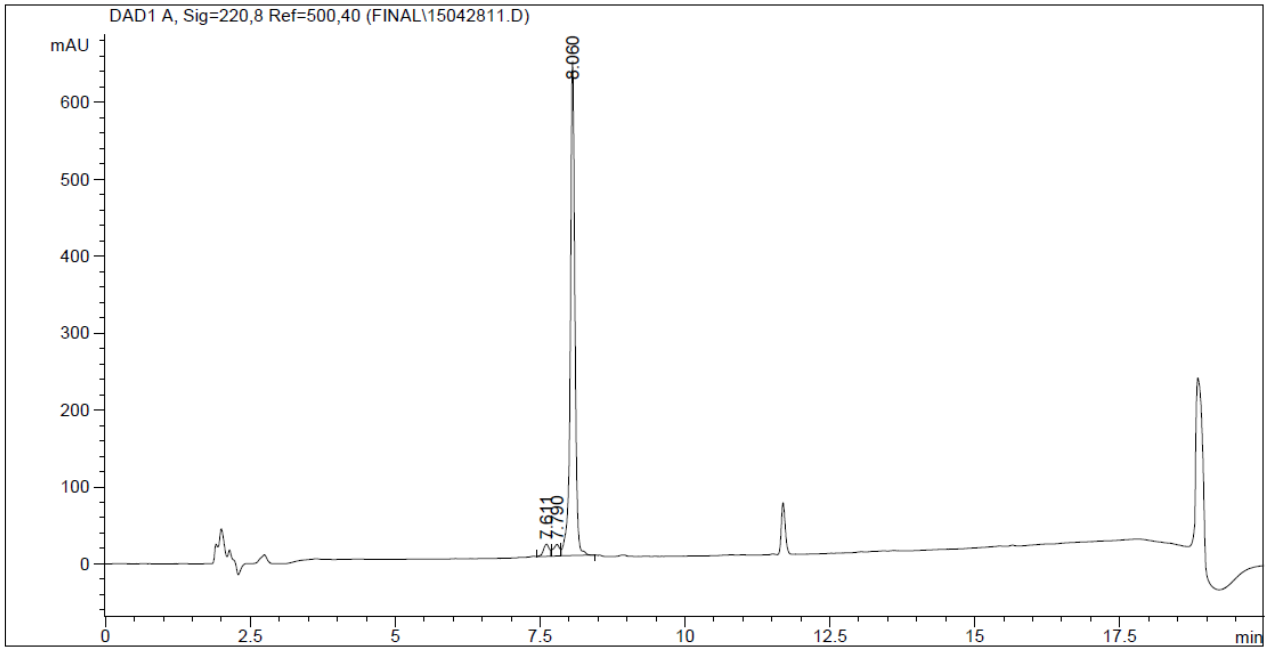

=====  
 Area Percent Report  
 =====

Sorted By : Signal  
 Multiplier : 1.0000  
 Dilution : 1.0000  
 Use Multiplier & Dilution Factor with ISTDs

Signal 1: DAD1 A, Sig=220,8 Ref=500,40

| Peak # | RetTime [min] | Type | Width [min] | Area [mAU*s] | Height [mAU] | Area %  |
|--------|---------------|------|-------------|--------------|--------------|---------|
| 1      | 7.611         | BV   | 0.1049      | 109.64160    | 15.80391     | 2.9180  |
| 2      | 7.790         | VV   | 0.1106      | 116.20490    | 14.95651     | 3.0926  |
| 3      | 8.060         | VB   | 0.0823      | 3531.62769   | 641.04938    | 93.9894 |

Totals : 3757.47419 671.80980

Results obtained with enhanced integrator!

# Compound 3c

## Acquisition Parameter

|                   |              |              |           |                          |          |
|-------------------|--------------|--------------|-----------|--------------------------|----------|
| Ion Source Type   | ESI          | Ion Polarity | Positive  | Alternating Ion Polarity | off      |
| Mass Range Mode   | Std/Normal   | Scan Begin   | 150 m/z   | Scan End                 | 2800 m/z |
| Capillary Exit    | 158.5 Volt   | Skim 1       | 40.0 Volt | Trap Drive               | 78.7     |
| Accumulation Time | 5464 $\mu$ s | Averages     | 5 Spectra | Auto MS/MS               | on       |

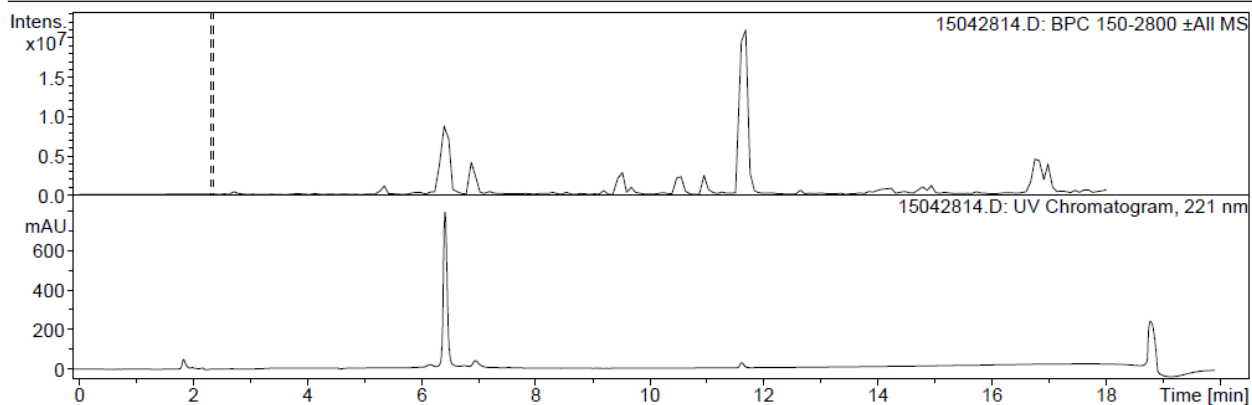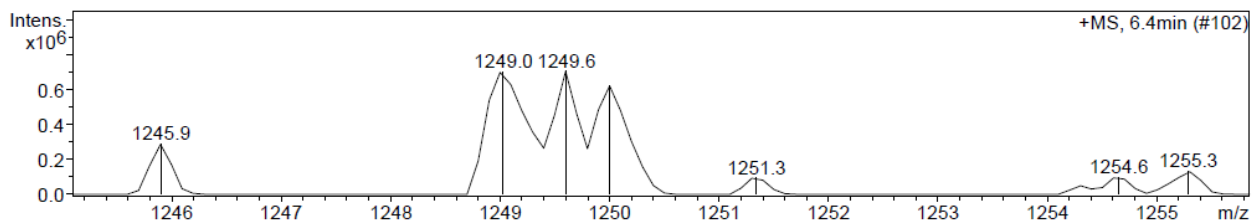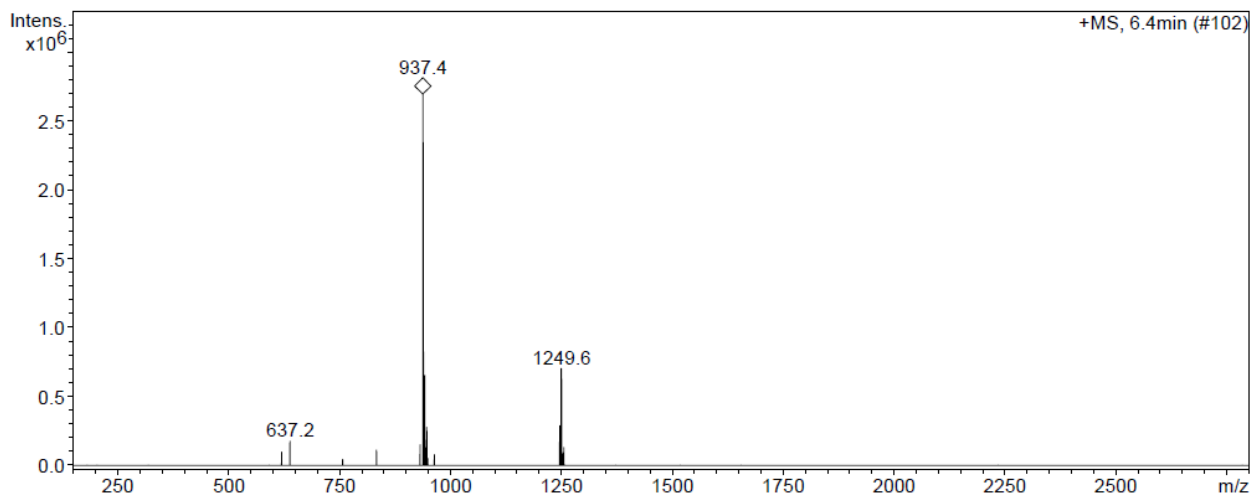

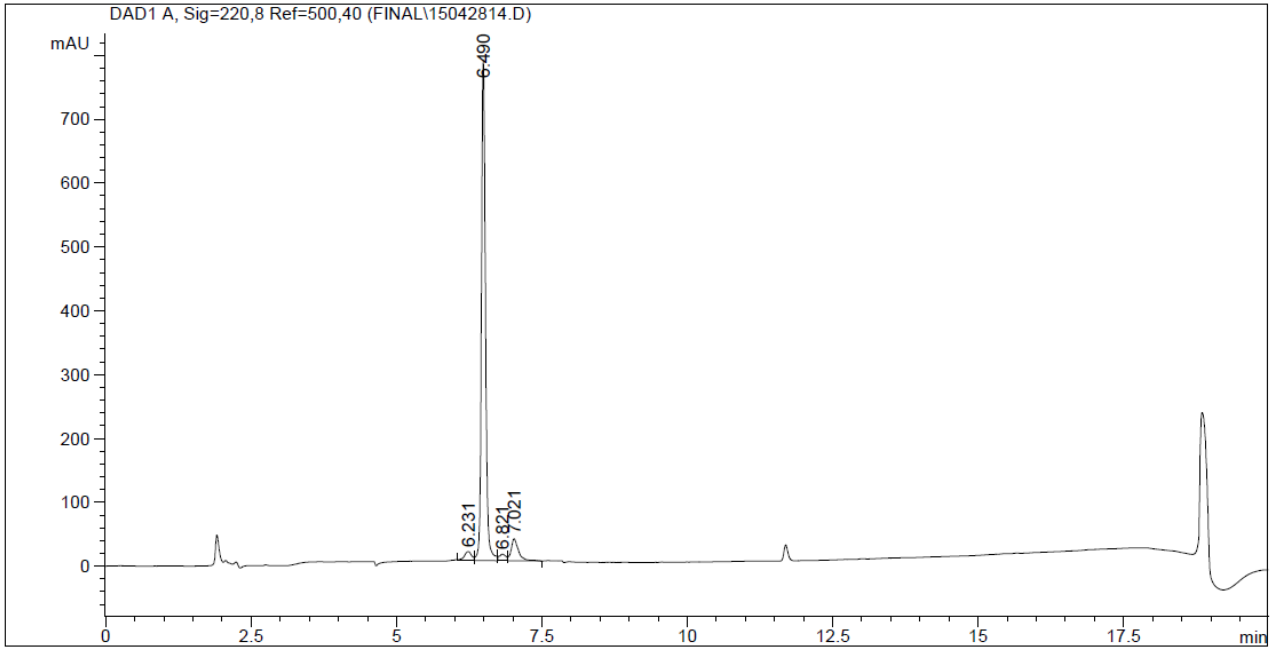

=====  
 Area Percent Report  
 =====

Sorted By : Signal  
 Multiplier : 1.0000  
 Dilution : 1.0000  
 Use Multiplier & Dilution Factor with ISTDs

Signal 1: DAD1 A, Sig=220,8 Ref=500,40

| Peak # | RetTime [min] | Type | Width [min] | Area [mAU*s] | Height [mAU] | Area %  |
|--------|---------------|------|-------------|--------------|--------------|---------|
| 1      | 6.231         | BV   | 0.1306      | 119.87806    | 13.89698     | 2.7843  |
| 2      | 6.490         | VV   | 0.0745      | 3804.76880   | 785.07361    | 88.3713 |
| 3      | 6.821         | VV   | 0.1105      | 78.53095     | 10.11899     | 1.8240  |
| 4      | 7.021         | VP   | 0.1262      | 302.25931    | 34.49945     | 7.0204  |

Totals : 4305.43712 843.58903

# Compound 4

## Acquisition Parameter

|                   |              |              |           |                          |          |
|-------------------|--------------|--------------|-----------|--------------------------|----------|
| Ion Source Type   | ESI          | Ion Polarity | Positive  | Alternating Ion Polarity | off      |
| Mass Range Mode   | Std/Normal   | Scan Begin   | 150 m/z   | Scan End                 | 2800 m/z |
| Capillary Exit    | 158.5 Volt   | Skim 1       | 40.0 Volt | Trap Drive               | 78.7     |
| Accumulation Time | 3343 $\mu$ s | Averages     | 5 Spectra | Auto MS/MS               | on       |

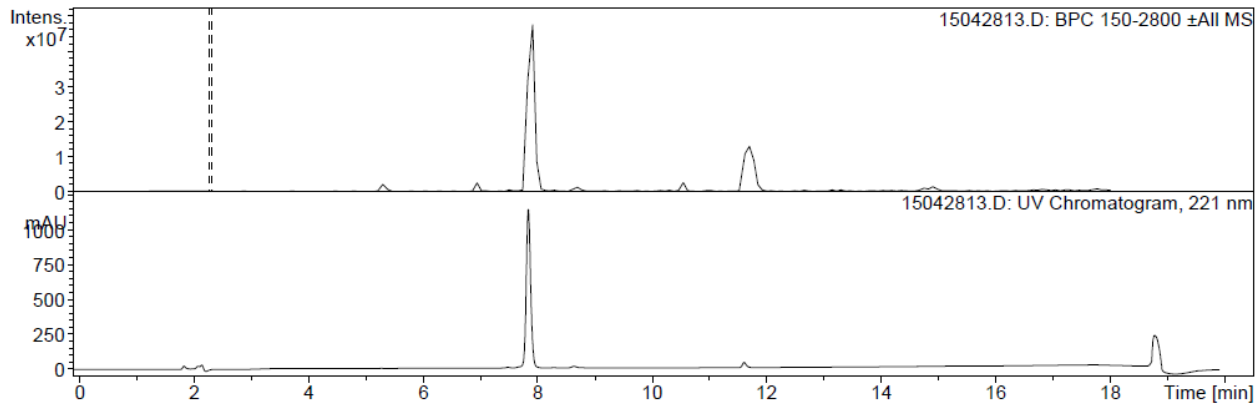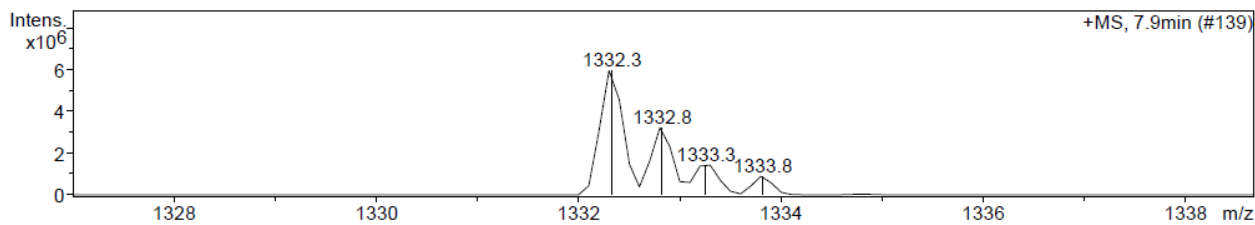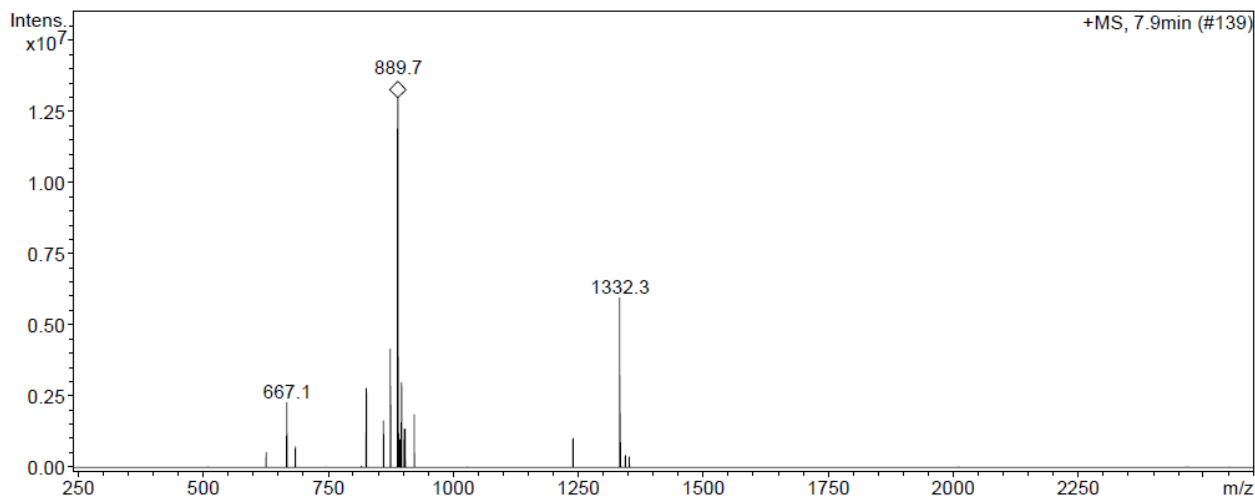

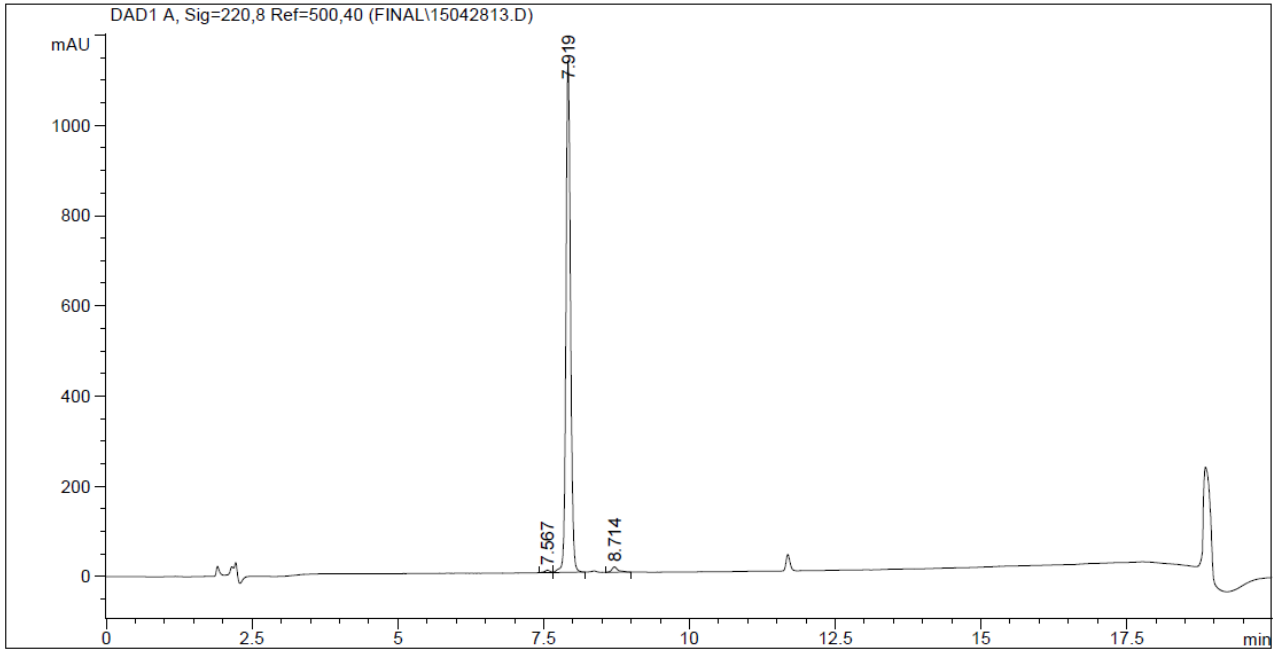

=====  
 Area Percent Report  
 =====

Sorted By : Signal  
 Multiplier : 1.0000  
 Dilution : 1.0000  
 Use Multiplier & Dilution Factor with ISTDs

Signal 1: DAD1 A, Sig=220,8 Ref=500,40

| Peak # | RetTime [min] | Type | Width [min] | Area [mAU*s] | Height [mAU] | Area %  |
|--------|---------------|------|-------------|--------------|--------------|---------|
| 1      | 7.567         | BV   | 0.0942      | 34.20601     | 5.30564      | 0.5412  |
| 2      | 7.919         | VP   | 0.0859      | 6198.38477   | 1132.29382   | 98.0746 |
| 3      | 8.714         | PB   | 0.1100      | 87.48347     | 11.59283     | 1.3842  |

Totals : 6320.07425 1149.19229

Results obtained with enhanced integrator!

## Biology

**Solid-phase receptor binding assay.** Purified  $\alpha_v\beta_3$  and  $\alpha_v\beta_5$  receptors (Chemicon International, Inc., Temecula, CA, USA) were diluted to 0.5  $\mu\text{g}/\text{mL}$  in coating buffer containing 20 mM Tris-HCl (pH 7.4), 150 mM NaCl, 1 mM  $\text{MnCl}_2$ , 2 mM  $\text{CaCl}_2$ , and 1 mM  $\text{MgCl}_2$ . An aliquot of diluted receptors (100  $\mu\text{L}/\text{well}$ ) was added to 96-well microtiter plates (NUNC MW 96F Medisorp Straight) and incubated overnight at 4 °C. The plates were then incubated with blocking solution (coating buffer plus 1% bovine serum albumin) for an additional 2 h at room temperature to block nonspecific binding, followed by 3 h incubation at room temperature with various concentrations ( $10^{-5}$ – $10^{-12}$  M) of test compounds in the presence of biotinylated vitronectin (1  $\mu\text{g}/\text{mL}$ ). Biotinylation was performed using an EZ-Link Sulfo-NHS-Biotinylation kit (Pierce, Rockford, IL, USA). After washing, the plates were incubated for 1 h at room temperature with biotinylated streptavidin–peroxidase complex (Amersham Biosciences, Uppsala, Sweden) followed by 30 min incubation with 100  $\mu\text{L}/\text{well}$  Substrate Reagent Solution (R&D Systems, Minneapolis, MN) before stopping the reaction with the addition of 50  $\mu\text{L}/\text{well}$  2N  $\text{H}_2\text{SO}_4$ . Absorbance at 415 nm was read in a Synergy<sup>TM</sup> HT Multi-Detection Microplate Reader (BioTek Instruments, Inc.). Each data point represents the average of triplicate wells; data analysis was carried out by nonlinear regression analysis with GraphPad Prism 5.0 software. Each experiment was repeated in triplicate.

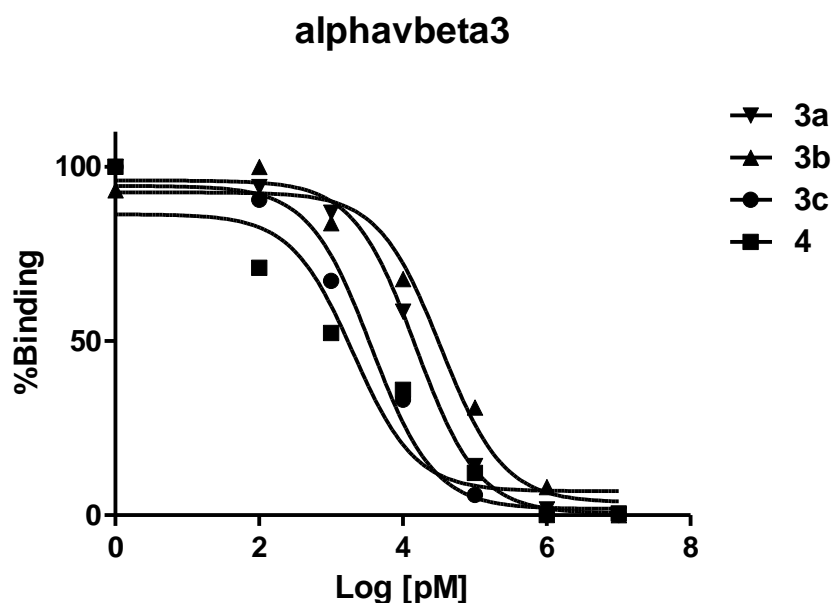

## alphavbeta5

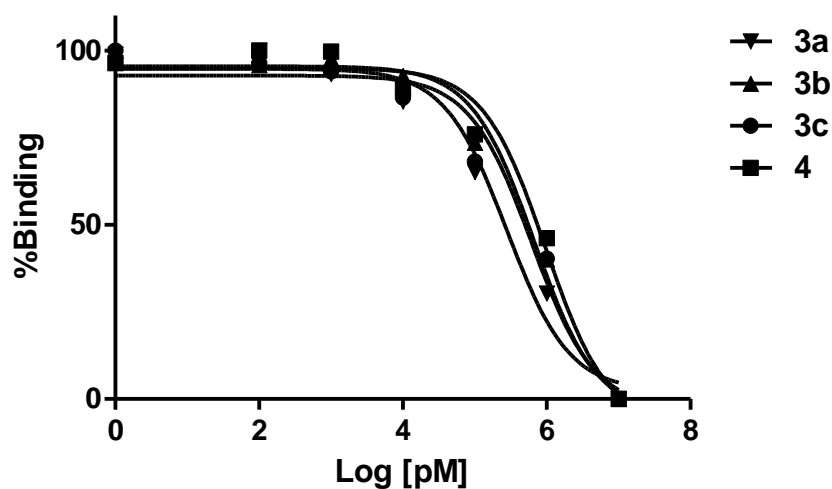

SD was below 10% for each data point.

**Drugs.** For *in vitro* studies, PTX and compounds under investigation were dissolved in dimethylsulfoxide (DMSO) and then added to culture medium. DMSO concentration in medium never exceeded 0.25%. For *in vivo* studies PTX was dissolved in a mixture of ethanol and cremophor ELP (50+50%) and kept at 4 °C. At treatment the drug was diluted in 90% of cold saline after magnetic stirring and administered i.v. keeping the vial in ice. Compound **3b** was dissolved and administered like PTX at room temperature.

**Cell lines and growth conditions.** The human ovarian carcinoma IGROV-1 cell line,<sup>1</sup> the cisplatin-resistant IGROV-1/Pt1 subline<sup>2</sup> and the human large cell lung H460 carcinoma cell line (ATCC, HTB-177) were cultured in RPMI-1640 medium; the human osteosarcoma U2-OS cell line (ATCC, HTB-96) was grown in Mc Coy's 5A medium. Medium was supplemented with 10% fetal calf serum.



**Cell sensitivity to drugs.** The cell sensitivity to antitumor agents was measured by using the growth-inhibition assay based on cell counting. Cells were seeded in duplicates into 6-well plates and exposed to drug 24 h later. After 72 h of drug incubation, cells were harvested for counting with a cell counter. IC<sub>50</sub> is defined as the drug concentration producing 50% decrease of cell growth. At least three independent experiments were performed.

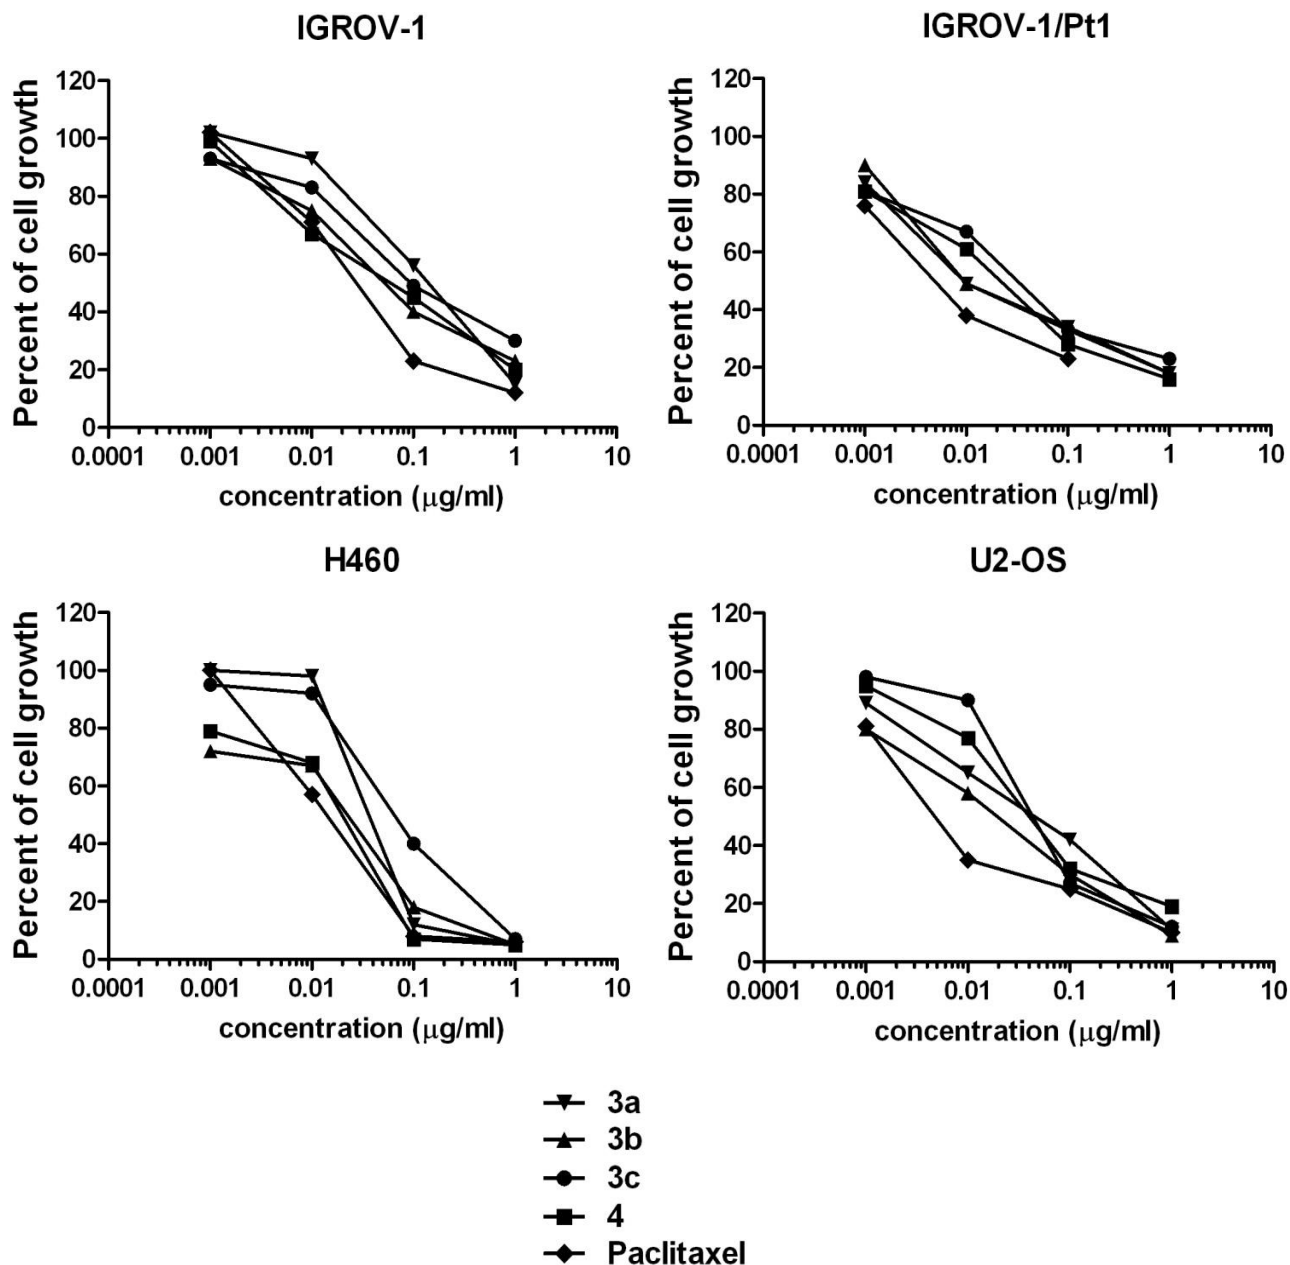

**Cell sensitivity to the compounds.**

The cell sensitivity was assessed after 72h of incubation with each compound. Paclitaxel was used as reference compound. A representative experiment for each cell line is shown. SD was below 10% for each data point.

**Antitumor activity studies.** All experiments of antitumor activity were carried out using female athymic Swiss nude mice, 8-10 weeks-old (Charles River, Calco, Italy). Mice were maintained in laminar flow rooms keeping temperature and humidity constant. Mice had free access to food and water. Experiments were approved by the Ethics Committee for Animal Experimentation of the Istituto Nazionale Tumori of Milan according to institutional guidelines. The IGROV-1/Pt1 human tumor xenograft, derived from cultures of the ovarian carcinoma cell line,<sup>2</sup> was used. Exponentially growing cells ( $10^7$  /mouse) were s.c. injected into the right flank of athymic nude mice and the tumor line was achieved by serial s.c. passages of fragments of regrowing tumors into healthy mice. Groups of five mice bearing bilateral s.c. tumors were employed. Tumor fragments were implanted on day 0 and tumor growth was followed by biweekly measurements of tumor diameters with a Vernier caliper. Tumor volume (TV) was calculated according to the formula:  $TV \text{ (mm}^3\text{)} = d^2 \times D / 2$  where d and D are the shortest and the longest diameter, respectively. Drugs were delivered i.v. and administered every 4 days for 4 times (q4d $\times$ 4). Treatment started three days after tumor implant, when tumors were just palpable. The efficacy of the drug treatment was assessed as tumor volume inhibition percentage (TVI%) in treated versus control mice, calculated as:  $TVI\% = 100 - (\text{mean TV treated} / \text{mean TV control} \times 100)$ , and complete regression rate (CR), i.e. disappearance of tumor lasting at least ten days after the end of treatment; log cell kill, evaluated by the formula:  $LCK = (T - C) / 3.32 \times DT$ , where T and C are the times (days) to reach a tumor volume in treated and control mice, respectively, and DT is the doubling time of control tumors. Tumor DT (days) was obtained from semi log best-fit curves of mean tumor volumes in untreated control mice plotted against time. The toxicity of the drug treatment was determined as body weight loss and lethal toxicity. Student t test (two tailed) exact test was used for statistical comparison of tumor volumes in mice.

1. Benard, J., Da Silva, J., De Blois, M. C., Boyer, P., Duvillard, P., Chiric, E., and Riou, G. (1985) Characterization of a human ovarian adenocarcinoma line, IGROV1, in tissue culture and in nude mice. *Cancer Res.* 45, 4970-4979.
2. Perego, P., Giarola, M., Righetti, S. C., Supino, R., Caserini, C., Delia, D., Pierotti, M. A., Miyashita, T., Reed, J. C., and Zunino, F. (1996) Association between cisplatin resistance and mutation of p53 gene and reduced bax expression in ovarian carcinoma cell systems. *Cancer Res.* 56, 556-562.
